# Supplementary material for: Machine Learning-Based Characterization and Identification of Tertiary Lymphoid Structures Using Spatial Transcriptomics Data
Source: MDPI journal article supplement (doi:10.3390/ijms25073887), 2024-03-30
Supplement: s1 [file s1]

## Tables

**Table S1:** A summary of the sample information

| No.                    | Received immunological therapy(RI) | Did not receive immunological therapy(NRI) | TLS <sup>a</sup> positive | Whether it is used in model construction | Training /Independent test |
|------------------------|------------------------------------|--------------------------------------------|---------------------------|------------------------------------------|----------------------------|
| ffpe <sup>b</sup> _c_2 | T                                  |                                            | T                         | T(RI <sup>c</sup> )                      | Independent test           |
| ffpe_c_3               | T                                  |                                            | T                         | T(RI)                                    | Training                   |
| ffpe_c_4               | T                                  |                                            | T                         | T(RI)                                    | Training                   |
| ffpe_c_7               | T                                  |                                            | T                         | T(RI)                                    | Independent test           |
| ffpe_c_10              | T                                  |                                            |                           |                                          |                            |
| ffpe_c_20              | T                                  |                                            | T                         | T(RI)                                    | Independent test           |
| ffpe_c_21              | T                                  |                                            |                           |                                          |                            |
| ffpe_c_34              | T                                  |                                            | T                         | T(RI)                                    | Independent test           |
| ffpe_c_36              | T                                  |                                            | T                         | T(RI)                                    | Training                   |
| ffpe_c_39              | T                                  |                                            | T                         | T(RI)                                    | Independent test           |
| ffpe_c_45              | T                                  |                                            | T                         | T(RI)                                    | Independent test           |
| ffpe_c_51              | T                                  |                                            | T                         | T(RI)                                    | Independent test           |
| frozen_a_1             |                                    | T                                          |                           |                                          |                            |
| frozen_a_3             |                                    | T                                          | T                         | T(NRI <sup>d</sup> )                     | Training                   |
| frozen_a_15            |                                    | T                                          | T                         | T(NRI)                                   | Independent test           |
| frozen_a_17            |                                    | T                                          |                           |                                          |                            |
| frozen_b_1             |                                    | T                                          | T                         | T(NRI)                                   | Training                   |
| frozen_b_7             |                                    | T                                          |                           |                                          |                            |
| frozen_b_13            |                                    | T                                          |                           |                                          |                            |
| frozen_b_18            |                                    | T                                          | T                         | T(NRI)                                   | Training                   |
| frozen_c_2             | T                                  |                                            | T                         |                                          |                            |
| frozen_c_5             | T                                  |                                            | T                         |                                          |                            |
| frozen_c_23            | T                                  |                                            | T                         |                                          |                            |
| frozen_c_57            | T                                  |                                            | T                         |                                          |                            |

<sup>a</sup> tertiary lymphoid structures

<sup>b</sup> ffpe: formalin fixation and paraffin embedding

<sup>c</sup> RI: the model constructed using the samples received immunological therapy

<sup>d</sup> NRI: the model constructed using the samples do not receive immunological therapy

**Table S2:** The number of TLS and NO\_TLS spots in training and independent test datasets.

| Model            | Train |        |
|------------------|-------|--------|
|                  | TLS   | NO_TLS |
| RI <sup>e</sup>  | 711   | 11077  |
| NRI <sup>f</sup> | 264   | 3239   |

| sample | TLS | NO_TLS | ALL  | Fraction of TLS |
|--------|-----|--------|------|-----------------|
| c_7    | 128 | 4847   | 4975 | 0.025729        |
| c_51   | 206 | 4153   | 4359 | 0.047259        |
| c_45   | 21  | 4541   | 4562 | 0.004603        |
| c_4    | 199 | 3607   | 3806 | 0.052286        |
| c_39   | 16  | 4924   | 4940 | 0.003239        |
| c_36   | 255 | 2951   | 3206 | 0.079538        |
| c_34   | 88  | 3497   | 3585 | 0.024547        |
| c_3    | 257 | 4498   | 4755 | 0.054048        |
| c_20   | 102 | 4846   | 4948 | 0.020614        |
| c_2    | 131 | 4378   | 4509 | 0.029053        |
| b_18   | 78  | 1108   | 1186 | 0.065767        |
| b_1    | 153 | 1796   | 1949 | 0.078502        |
| a_3    | 35  | 1229   | 1264 | 0.02769         |
| a_15   | 34  | 1285   | 1319 | 0.025777        |

**Table S3:** The cross-validation result of different models.

| method                                      | RI accuracy | NRI accuracy |
|---------------------------------------------|-------------|--------------|
| Logistic Regression                         | 0.949901    | 0.949697     |
| Gaussian Naïve Bayes Classifier             | 0.885785    | 0.868678     |
| Decision Tree Classifier                    | 0.930208    | 0.920511     |
| Multilayer Perceptron                       | 0.958518    | 0.959309     |
| Support Vector Machine with Linear Kernel   | 0.948807    | 0.950715     |
| Support Vector Machine with Gaussian Kernel | 0.942463    | 0.950546     |

**Table S4:** The values of parameters in SVC() in sklearn.

<sup>e</sup> RI: the model constructed using the samples received immunological therapy

<sup>f</sup> NRI: the model constructed using the samples do not receive immunological therapy

|                                                       |                       |                       |      |                                               |
|-------------------------------------------------------|-----------------------|-----------------------|------|-----------------------------------------------|
| parameters for RI <sup>g</sup><br>(kernel = "linear") | Class weight for<br>1 | Class weight<br>for 0 | C    | Gamma(only<br>for RBF SVC)                    |
| original                                              | 0.8                   | 0.2                   | 1    | —                                             |
| The chi-square test and<br>DEG <sup>h</sup>           | 0.75                  | 0.25                  | 1000 | —                                             |
| Permutation<br>importance                             | 0.8                   | 0.2                   | 1000 | —                                             |
|                                                       |                       |                       |      |                                               |
| parameters for NRI <sup>i</sup><br>(kernel = "rbf")   | Class weight for<br>1 | Class weight<br>for 0 | C    | Gamma(only<br>for RBF SVC)                    |
| original                                              | 0.8                   | 0.2                   | 1    | Default<br>[1 /<br>(n_features *<br>X.var())] |
| The chi-square test and<br>DEG                        | 0.75                  | 0.25                  | 1    | 1                                             |
| Permutation<br>importance                             | 0.8                   | 0.2                   | 1    | 1                                             |

**Table S5:** The performance of the model constructed using the samples that received immunological therapy(RI model) and the model constructed using the samples that did not receive immunological therapy(NRI model) in the samples used for training and independent test

| NRI<br>model | original |                    | The chi-square test and DEG |             | permutation<br>importance |          |
|--------------|----------|--------------------|-----------------------------|-------------|---------------------------|----------|
| sample       | accuracy | auroc <sup>j</sup> | accuracy                    | auroc       | accuracy                  | auroc    |
| a_15         | 0.941325 | 0.868457           | 0.942336874                 | 0.814808004 | 0.925645                  | 0.782772 |
| a_3          | 0.984712 | 0.986422           | 0.984711605                 | 0.992456571 | 0.983322                  | 0.985969 |
| b_1          | 0.94296  | 0.961424           | 0.963514902                 | 0.975879327 | 0.947585                  | 0.95053  |
| b_18         | 0.857504 | 0.890563           | 0.927487352                 | 0.901780755 | 0.886172                  | 0.878032 |

<sup>g</sup> RI: the model constructed using the samples received immunological therapy

<sup>h</sup> DEG: differentially expressed genes

<sup>i</sup> NRI: the model constructed using the samples does not receive immunological therapy

<sup>j</sup> auroc: Area under receiver operating characteristic curve

| RI model | original |          | The chi-square test and DEG |          | permutation importance |          |
|----------|----------|----------|-----------------------------|----------|------------------------|----------|
| sample   | accuracy | auroc    | accuracy                    | auroc    | accuracy               | auroc    |
| c_2      | 0.936859 | 0.76734  | 0.950022                    | 0.688138 | 0.957831               | 0.699383 |
| c_7      | 0.903343 | 0.872993 | 0.900121                    | 0.849174 | 0.905356               | 0.820847 |
| c_20     | 0.979833 | 0.800051 | 0.977388                    | 0.733468 | 0.951925               | 0.75824  |
| c_34     | 0.373368 | 0.941802 | 0.430519                    | 0.898241 | 0.267479               | 0.826765 |
| c_39     | 0.97265  | 0.797612 | 0.958874                    | 0.790625 | 0.953809               | 0.92103  |
| c_45     | 0.985271 | 0.866744 | 0.987909                    | 0.806916 | 0.986371               | 0.802004 |
| c_51     | 0.950173 | 0.939518 | 0.9594                      | 0.912481 | 0.957093               | 0.85768  |
| c_3      | 0.897981 | 0.947666 | 0.933109                    | 0.942702 | 0.937737               | 0.929429 |
| c_4      | 0.907025 | 0.952985 | 0.931314                    | 0.946185 | 0.915644               | 0.923763 |
| c_36     | 0.976287 | 0.994233 | 0.960374                    | 0.970863 | 0.949766               | 0.922054 |

**Table S6:** A summary of the marker gene information

| Gene         | Ensemble ID     | Description                                                                                                                                                                                                                                                           |
|--------------|-----------------|-----------------------------------------------------------------------------------------------------------------------------------------------------------------------------------------------------------------------------------------------------------------------|
| <b>ACTB</b>  | ENSG00000075624 | This gene encodes one of six various actin proteins essential for cell motility, structural integrity, and intercellular signaling.[1]                                                                                                                                |
| <b>BANK1</b> | ENSG00000153064 | The protein encoded by this gene is a B-cell-specific scaffold protein that functions in B-cell receptor-induced calcium mobilization from intracellular stores [2]                                                                                                   |
| <b>BLK</b>   | ENSG00000136573 | This gene encodes a nonreceptor tyrosine-kinase of the src family involved in cell proliferation and differentiation. The protein has a role in B-cell receptor signaling and B-cell development.[3]                                                                  |
| <b>C7</b>    | ENSG00000112936 | This gene encodes a serum glycoprotein that forms a membrane attack complex together with complement components C5b, C6, C8, and C9 as part of the terminal complement pathway of the innate immune system.[4]                                                        |
| <b>CCL19</b> | ENSG00000172724 | May play a role not only in inflammatory and immunological responses but also in normal lymphocyte recirculation and homing. May play an important role in the trafficking of T-cells in the thymus, and T-cell and B-cell migration to secondary lymphoid organs.[5] |
| <b>CD37</b>  | ENSG00000104894 | This encoded protein is a member of the tetraspanin family. The proteins mediate signal transduction events that play a role in the regulation of cell development, activation, growth, and motility. It may play a role in T-                                        |

|               |                  |                                                                                                                                                                                                                                                                                                                                                                          |
|---------------|------------------|--------------------------------------------------------------------------------------------------------------------------------------------------------------------------------------------------------------------------------------------------------------------------------------------------------------------------------------------------------------------------|
|               |                  | cell-B-cell interactions.[6]                                                                                                                                                                                                                                                                                                                                             |
| <b>DCN</b>    | ENSG00000011465  | This gene encodes a member of the small leucine-rich proteoglycan family of proteins, which plays a role in collagen fibril assembly. The binding of this protein to multiple cell surface receptors mediates its role in tumor suppression, including a stimulatory effect on autophagy and inflammation and an inhibitory effect on angiogenesis and tumorigenesis.[7] |
| <b>EEF1A1</b> | ENSG000000156508 | This gene encodes an isoform of the alpha subunit of the elongation factor-1 complex, which is responsible for the enzymatic delivery of aminoacyl tRNAs to the ribosome.[8]                                                                                                                                                                                             |
| <b>FCRL1</b>  | ENSG000000163534 | This gene encodes a member of the immunoglobulin receptor superfamily and is one of several Fc receptor-like glycoproteins.[9]                                                                                                                                                                                                                                           |
| <b>FN1</b>    | ENSG000000115414 | This gene encodes fibronectin. Fibronectin is involved in cell adhesion and migration processes including embryogenesis, wound healing, blood coagulation, host defense, and metastasis.[10]                                                                                                                                                                             |
| <b>FTH1</b>   | ENSG000000167996 | This gene encodes the heavy subunit of ferritin, the major intracellular iron storage protein in prokaryotes and eukaryotes.[11]                                                                                                                                                                                                                                         |
| <b>FTL</b>    | ENSG000000087086 | This gene encodes the light subunit of the ferritin protein. Ferritin is the major intracellular iron storage protein in prokaryotes and eukaryotes.[12]                                                                                                                                                                                                                 |
| <b>HSPB1</b>  | ENSG000000106211 | This gene encodes a member of the small heat shock protein (HSP20) family of proteins. In response to environmental stress, the encoded protein translocates from the cytoplasm to the nucleus and functions as a molecular chaperone that promotes the correct folding of other proteins. [13]                                                                          |
| <b>IGHA1</b>  | ENSG000000211895 | Contributes to immunoglobulin receptor binding activity. Involved in antibacterial humoral response; glomerular filtration; and positive regulation of respiratory burst.[14]                                                                                                                                                                                            |
| <b>IGHG1</b>  | ENSG000000211896 | Enable antigen binding activity and immunoglobulin receptor binding activity and involve in several processes, including activation of immune response; defense response to another organism; and phagocytosis[15][16][17][18][19][20]                                                                                                                                   |
| <b>IGHG2</b>  | ENSG000000211893 |                                                                                                                                                                                                                                                                                                                                                                          |
| <b>IGHG4</b>  | ENSG000000211892 |                                                                                                                                                                                                                                                                                                                                                                          |
| <b>IGLC1</b>  | ENSG000000211675 |                                                                                                                                                                                                                                                                                                                                                                          |
| <b>IGLC2</b>  | ENSG000000211677 |                                                                                                                                                                                                                                                                                                                                                                          |
| <b>IGLC3</b>  | ENSG000000211679 |                                                                                                                                                                                                                                                                                                                                                                          |
| <b>IGHG3</b>  | ENSG000000211897 | Enable antigen binding activity and immunoglobulin receptor binding activity. Involved in retina homeostasis.[21][22]                                                                                                                                                                                                                                                    |
| <b>IGKC</b>   | ENSG000000211592 |                                                                                                                                                                                                                                                                                                                                                                          |

|                |                 |                                                                                                                                                                                                                                                                                                   |
|----------------|-----------------|---------------------------------------------------------------------------------------------------------------------------------------------------------------------------------------------------------------------------------------------------------------------------------------------------|
| <b>IGHM</b>    | ENSG00000211899 | The constant region of immunoglobulin heavy chains.[23]                                                                                                                                                                                                                                           |
| <b>IGHGP</b>   | ENSG00000253755 | IGHGP (Immunoglobulin Heavy Constant Gamma P (Non-Functional)) is a Pseudogene.[24]                                                                                                                                                                                                               |
| <b>IGLV3-1</b> | ENSG00000211673 | V region of the variable domain of immunoglobulin light chains that participate in antigen recognition.[25]                                                                                                                                                                                       |
| <b>LTB</b>     | ENSG00000227507 | an inducer of the inflammatory response system and involved in the normal development of lymphoid tissue.[26]                                                                                                                                                                                     |
| <b>MT2A</b>    | ENSG00000125148 | This gene is a member of the metallothionein family of genes. These proteins act as anti-oxidants, protect against hydroxyl free radicals, are important in the homeostatic control of metal in the cell, and play a role in the detoxification of heavy metals.[27]                              |
| <b>PTGDS</b>   | ENSG00000107317 | PGD2 is also involved in smooth muscle contraction/relaxation and is a potent inhibitor of platelet aggregation.[28]                                                                                                                                                                              |
| <b>RPS27</b>   | ENSG00000177954 | Component of the small ribosomal subunit.[29]                                                                                                                                                                                                                                                     |
| <b>TGFBI</b>   | ENSG00000120708 | This protein is induced by transforming growth factor-beta and acts to inhibit cell adhesion.[30]                                                                                                                                                                                                 |
| <b>TPT1</b>    | ENSG00000133112 | The encoded protein is involved in various cellular pathways, including apoptosis, protein synthesis, and cell division. It binds to and stabilizes microtubules, and removal of this protein through phosphorylation is required for progression through mitotic and meiotic cell divisions.[31] |
| <b>VIM</b>     | ENSG00000026025 | This gene encodes a type III intermediate filament protein. This protein is involved in neuritogenesis and cholesterol transport and functions as an organizer of several other critical proteins involved in cell attachment, migration, and signaling.[32]                                      |

## Figures

**Figure S1:** The permutation feature importance of gene signatures calculated in the sample collected from the patients who have not received immunological therapy(NRI samples). We consider genes with positive values to be important and retained as markers of TLS, while others are filtered out.

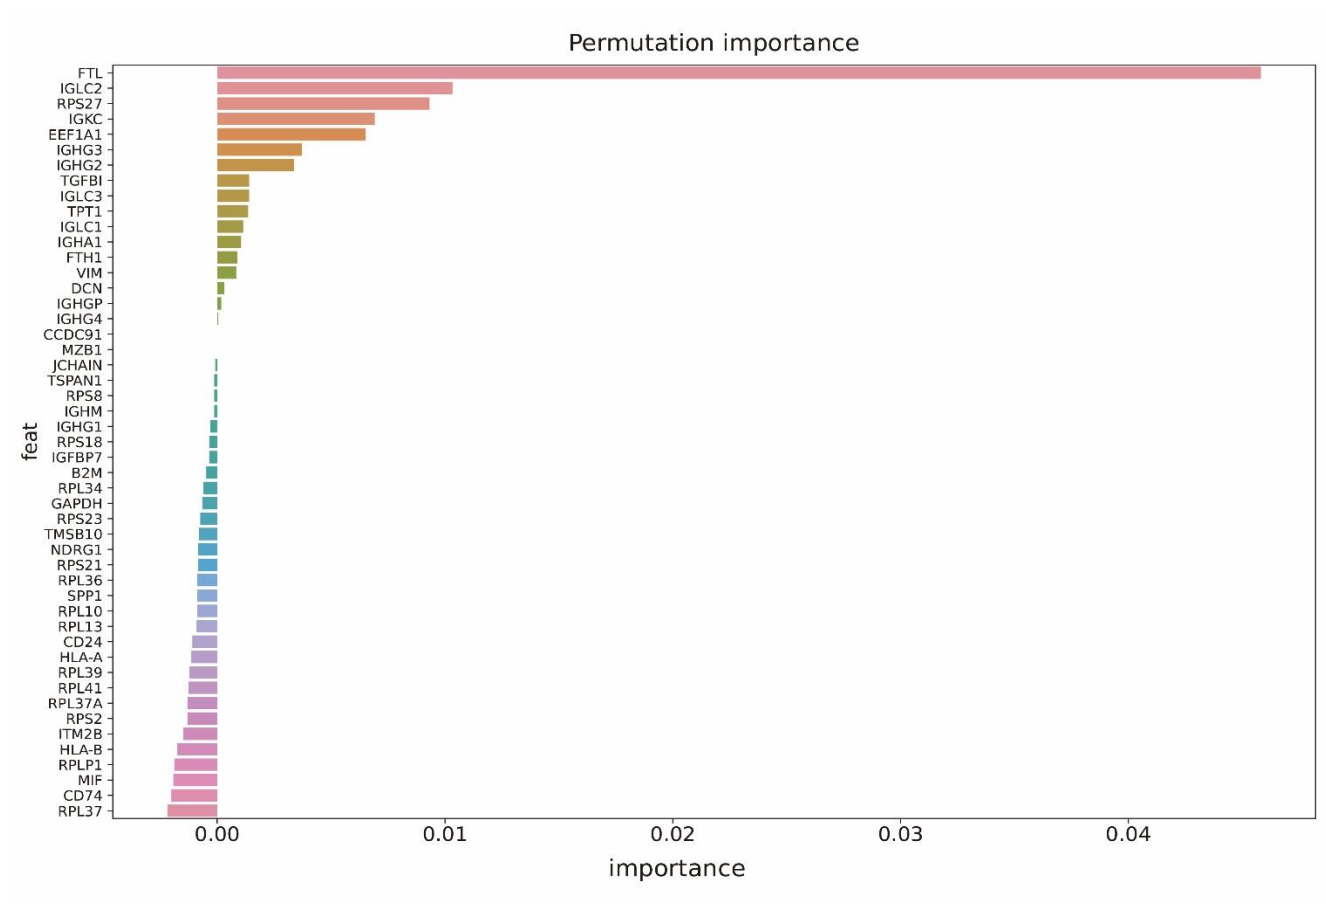

**Figure S2:** The model's performance constructed using the genes selected by differential expression analysis and chi-square test. A, C: The receiver operating characteristic curve (ROC) of training and independent test of the model constructed using the sample collected from the patients who have received immunological therapy(RI model). A represents the performance of the RI model in training samples, C represents the performance of the RI model in all the samples used for training(c\_3, c\_4, c\_36), and independent test(c\_2, c\_7, c\_20, c\_34, c\_39, c\_45, c\_51) B, D: The receiver operating characteristic curve (ROC) of the model constructed using the sample collected from the patients who have not received immunological therapy(NRI model). B represents the performance of the NRI model in training samples, and D represents the performance of the NRI model in all the samples used for training(a\_3, b\_1, b\_18) and independent test(a\_15).

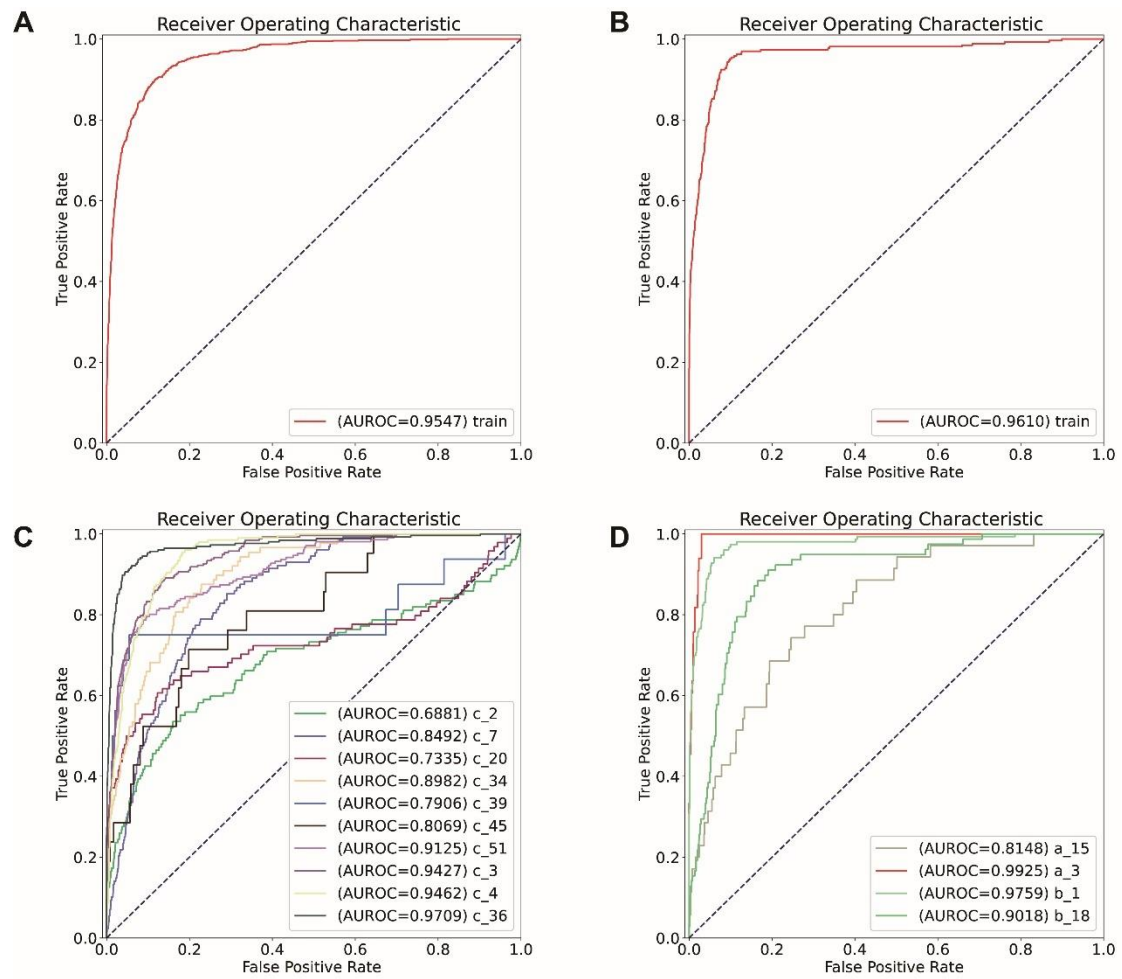



### Figure S3: The prediction results visualized in spatial

A, B, C: The prediction results of the model constructed using the sample collected from the patients who have received immunological therapy(RI model), c\_36 are the samples used for training, and c\_2, c\_7, c\_34, c\_39, and c\_45 are the samples used for the independent test. A represents the original model, which is constructed using the dataset without feature selection, B represents the model construct using the gene selected by differentially expressed genes and chi-square test(DEGs), C represents the final model constructed using the genes selected by permutation importance, D: The annotation of TLS provided by the GEO dataset("the correct answer"). Yellow represents TLSs, while dark blue represents NO-TLS.

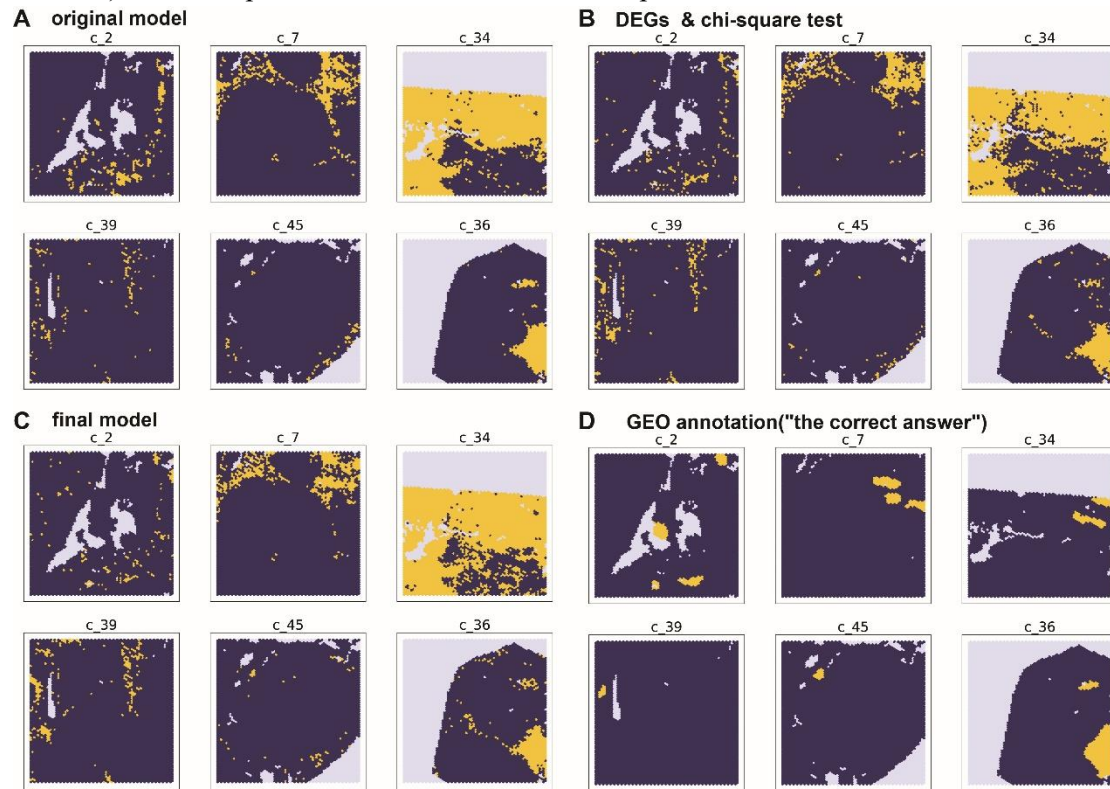

**Figure S4-S7:** the expression of the markers identified through the model constructed using the sample collected from the patients who have not received immunological therapy(NRI model), samples a\_3, b\_1, and b\_18 are used for the training of the NRI model, while sample a\_15 is used for the independent test.

**Figure S4: The markers' expression in a\_3**

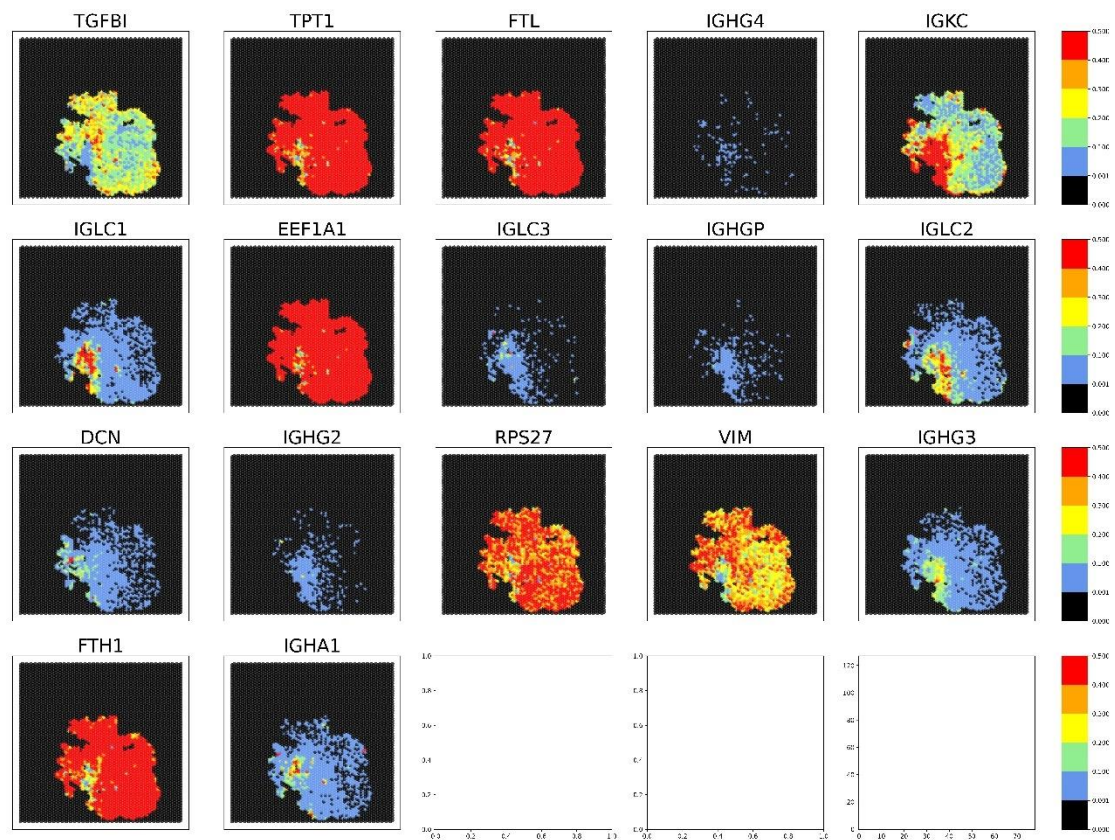

**Figure S5: The markers' expression in a\_15**

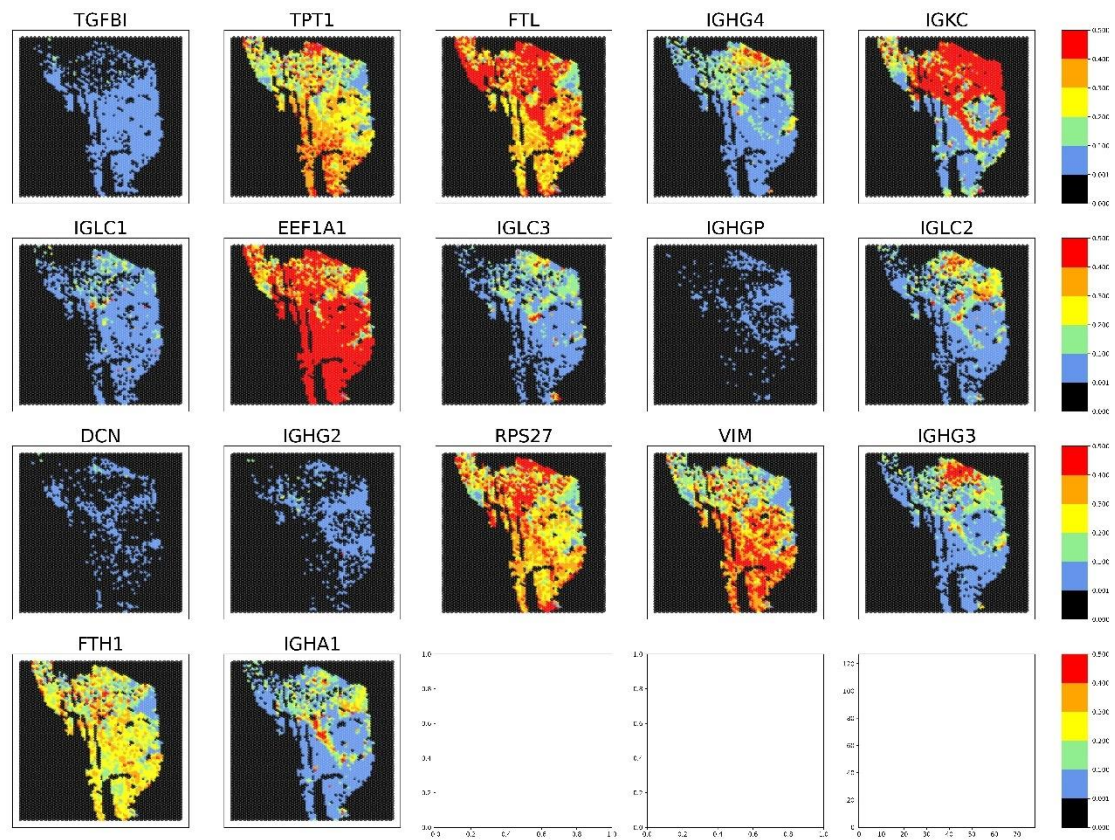



**Figure S6: The markers' expression in b\_1**

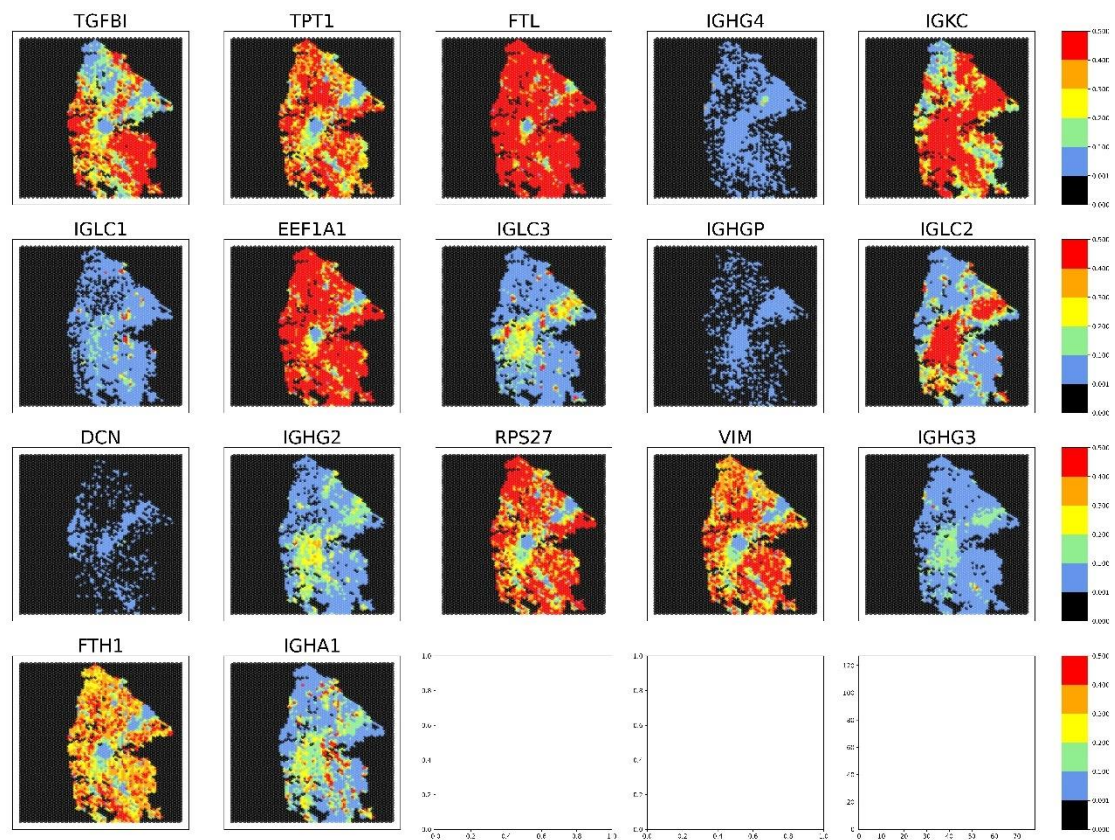

**Figure S7: The markers' expression in b\_18**

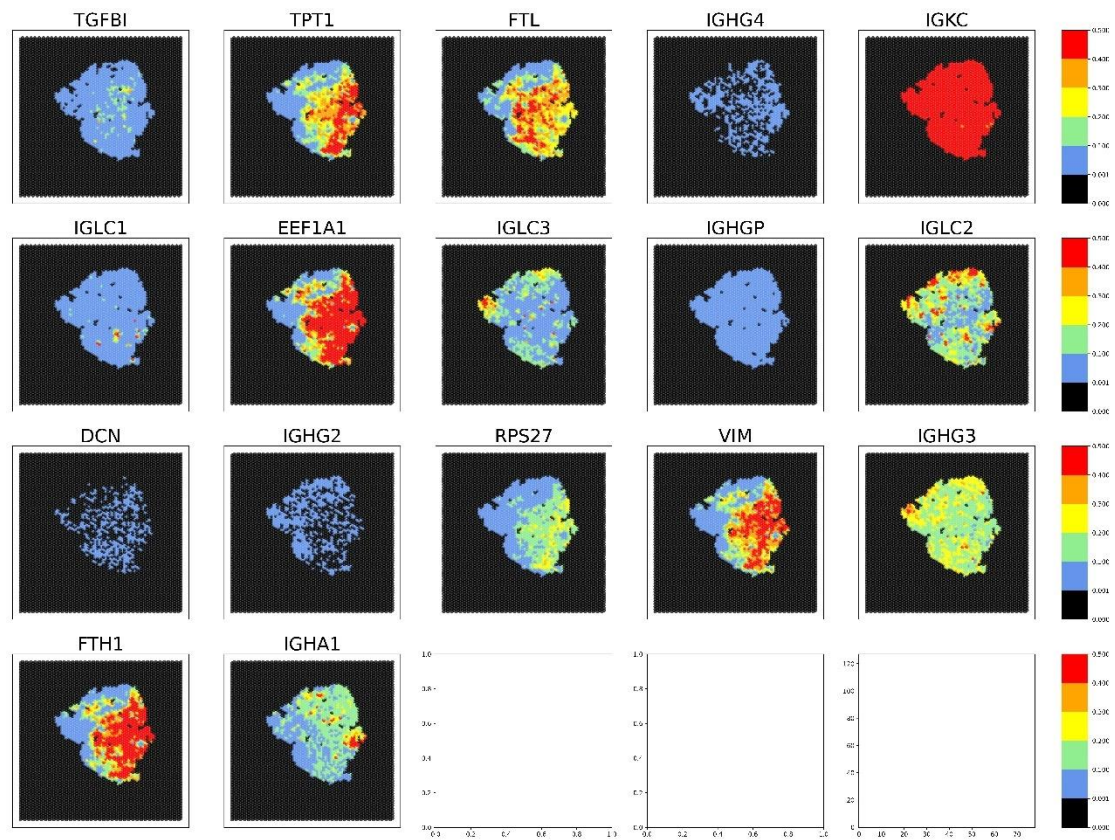

**Figure S8-S17** the expression of the markers identified through the model constructed using the sample collected from the patients who have received immunological therapy(RI model), samples c\_3, c\_4, and c\_36 are used for the training of the RI model, while c\_2, c\_7, c\_20, c\_34, c\_39, c\_45, c\_51 is used for the independent test.

**Figure S8: The markers' expression in c\_2**

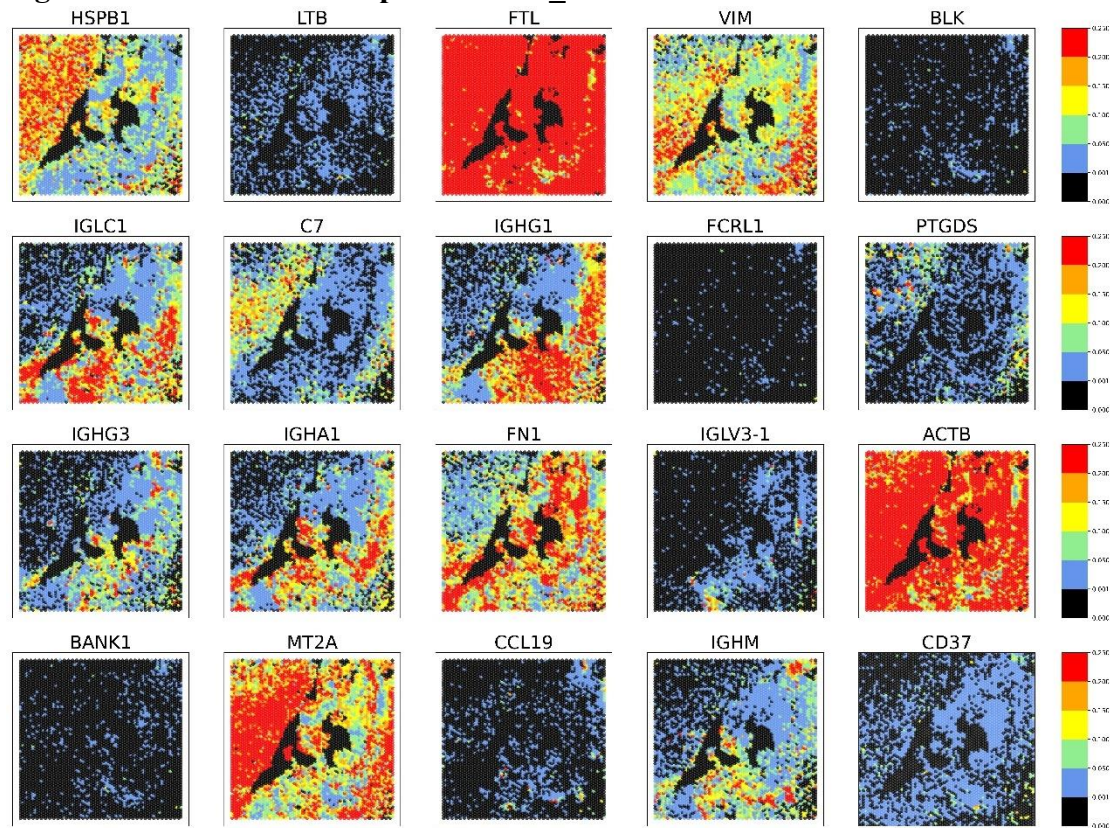



**Figure S9: The markers' expression in c\_3**

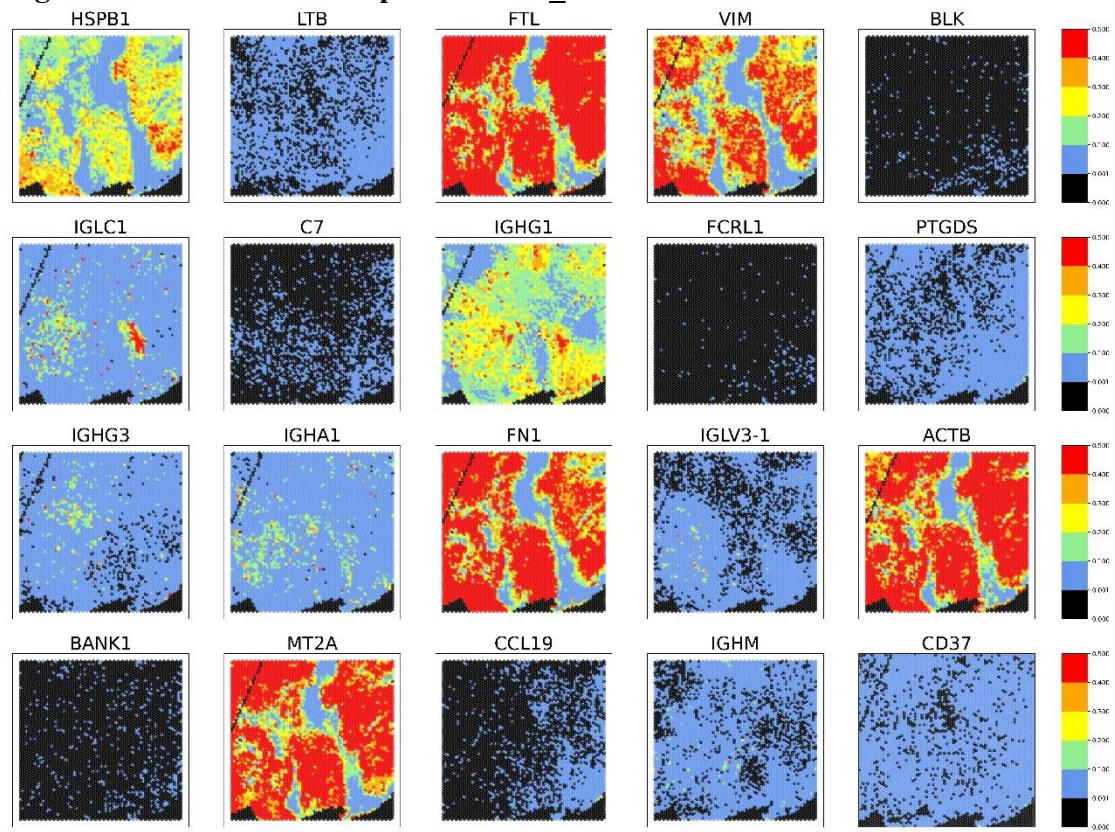

**Figure S10: The markers' expression in c\_4**

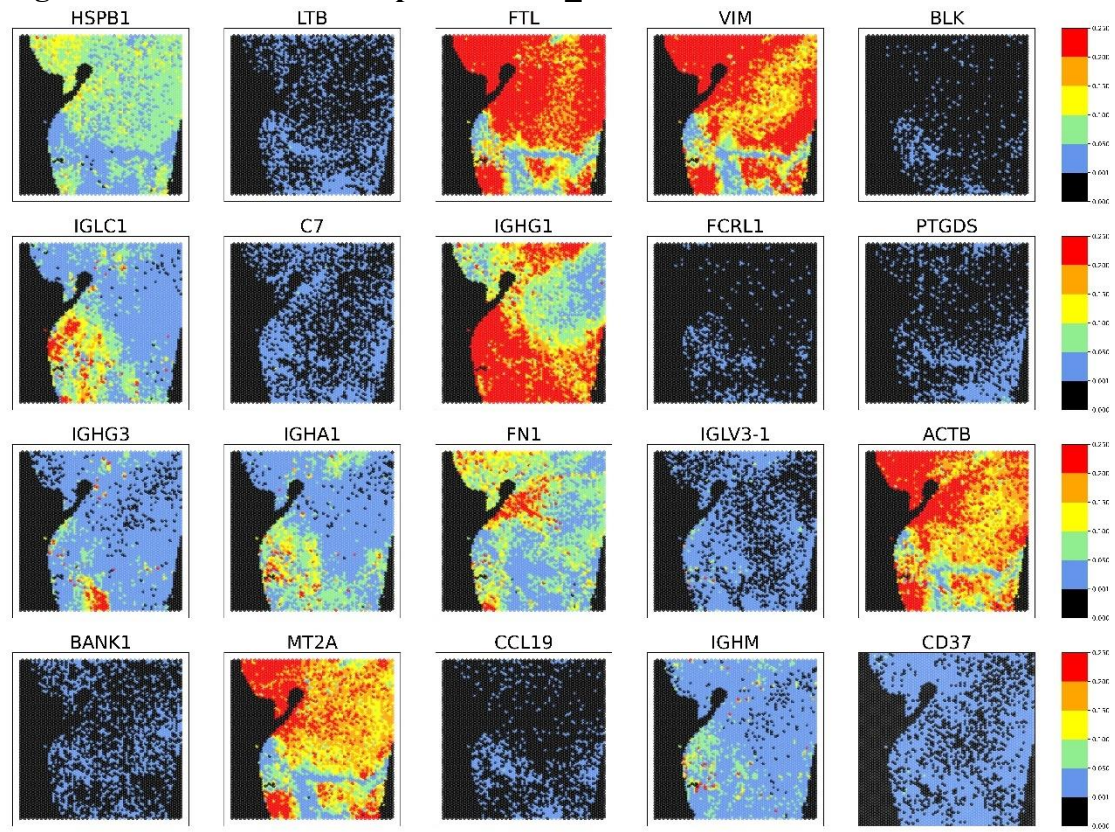



**Figure S11: The markers' expression in c\_7**

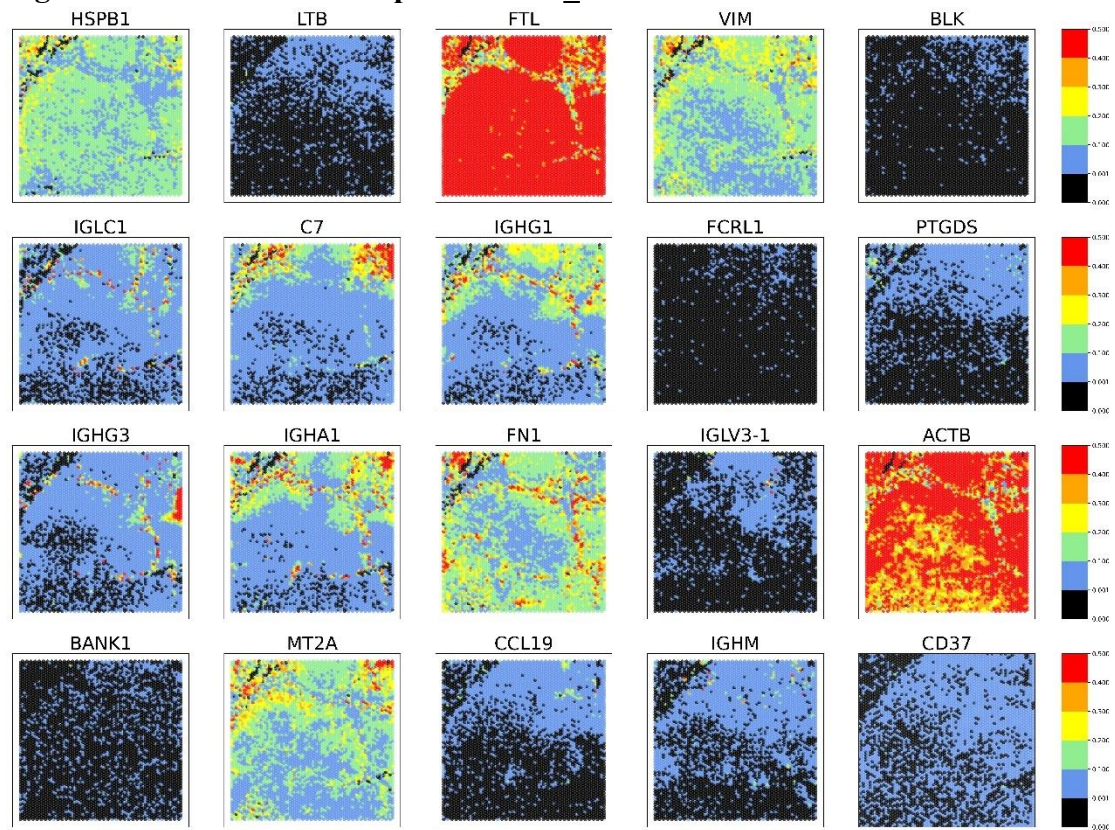

**Figure S12: The markers' expression in c\_20**

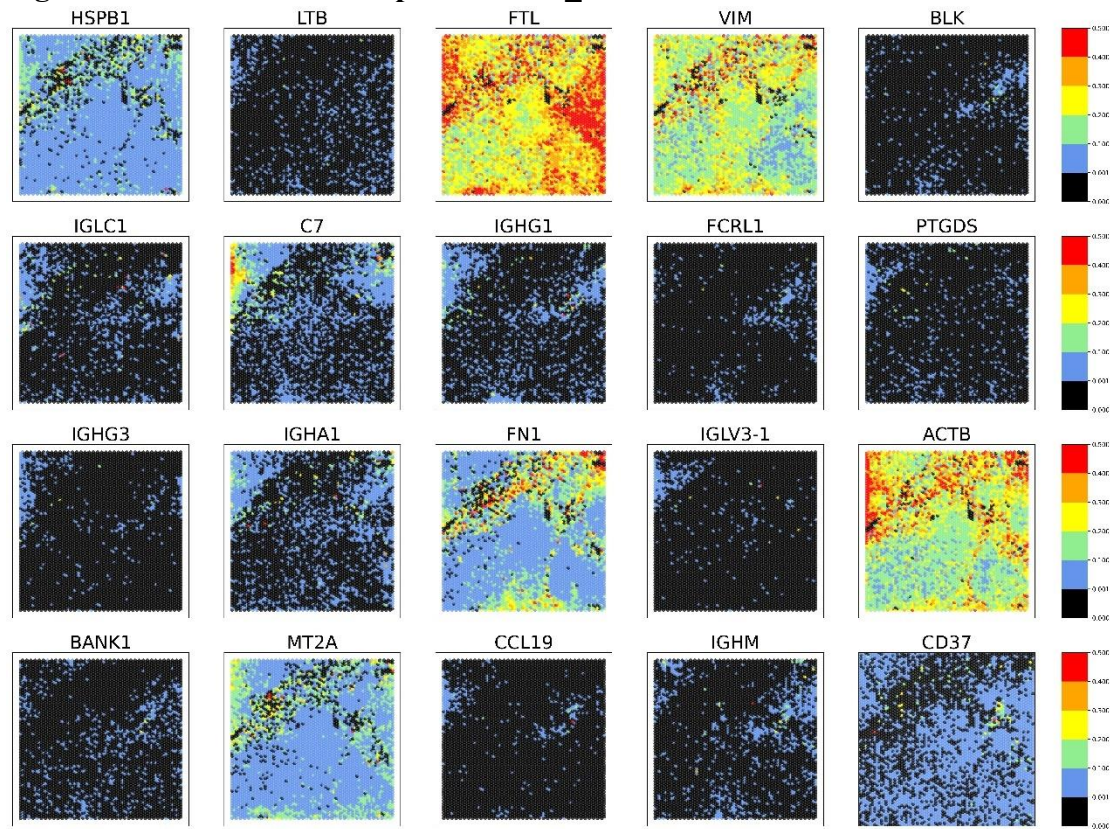



**Figure S13: The markers' expression in c\_34**

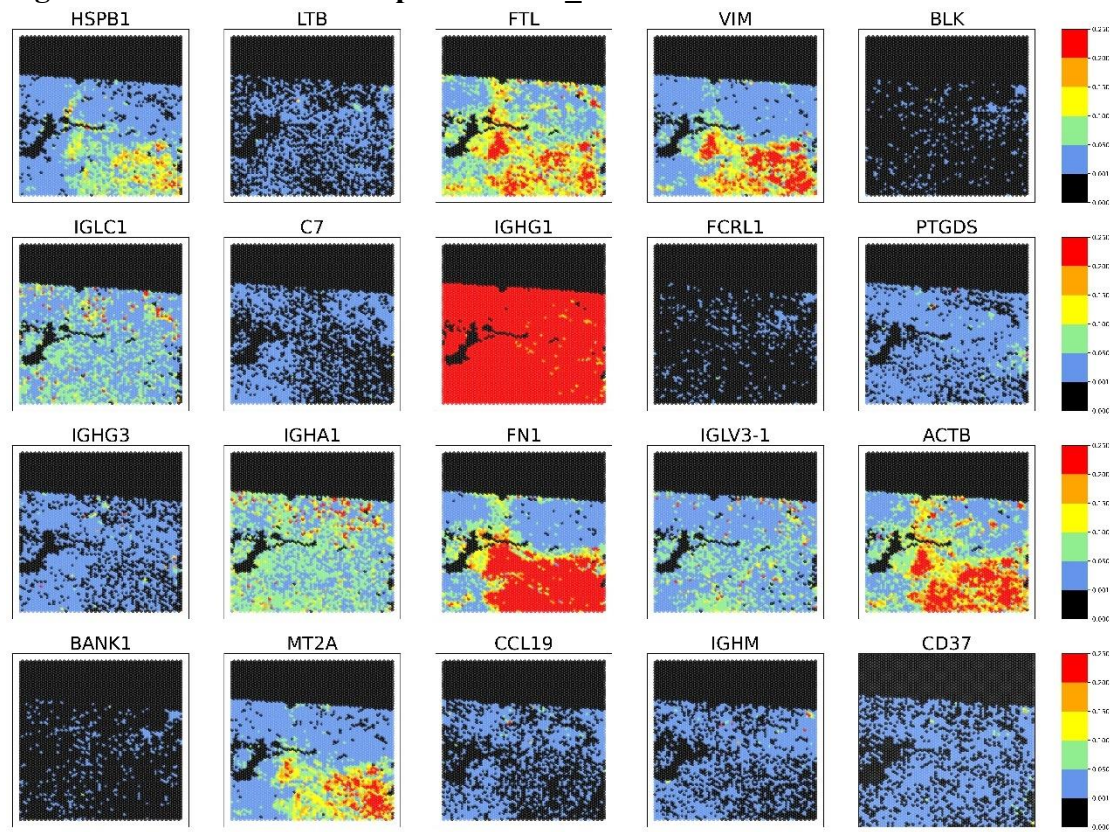

**Figure S14: The markers' expression in c\_36**

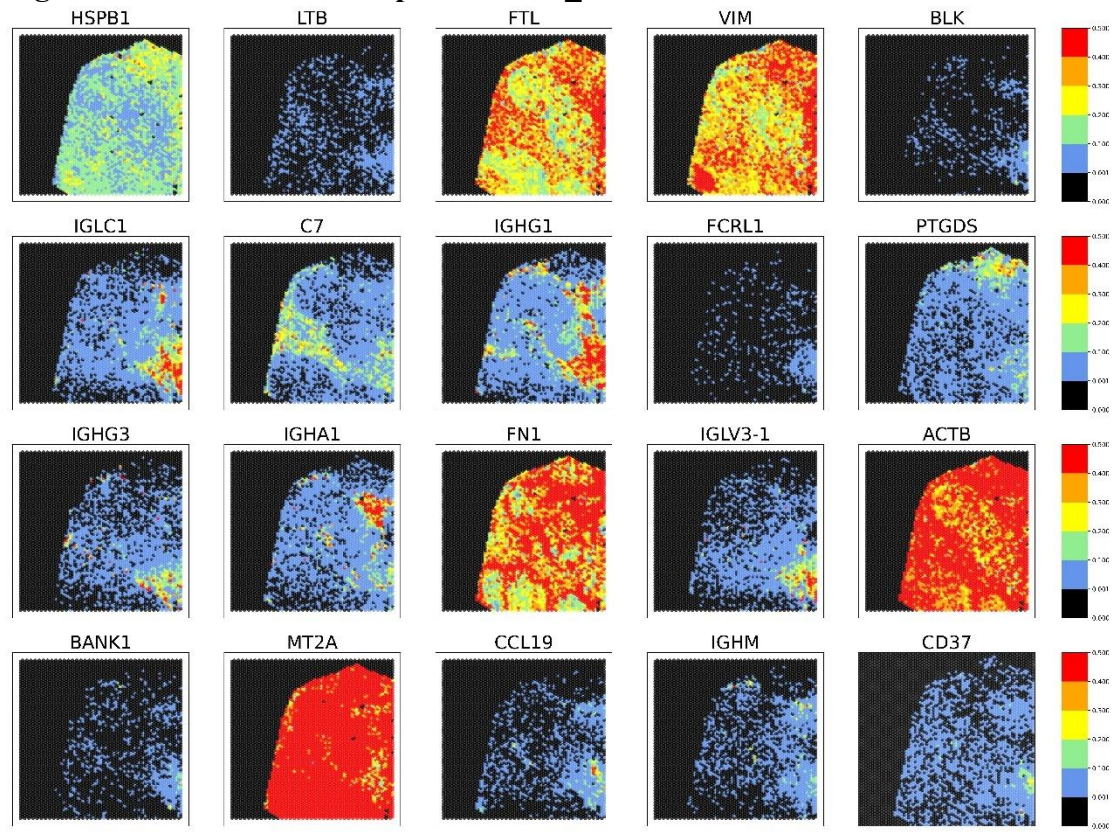



**Figure S15: The markers' expression in c\_39**

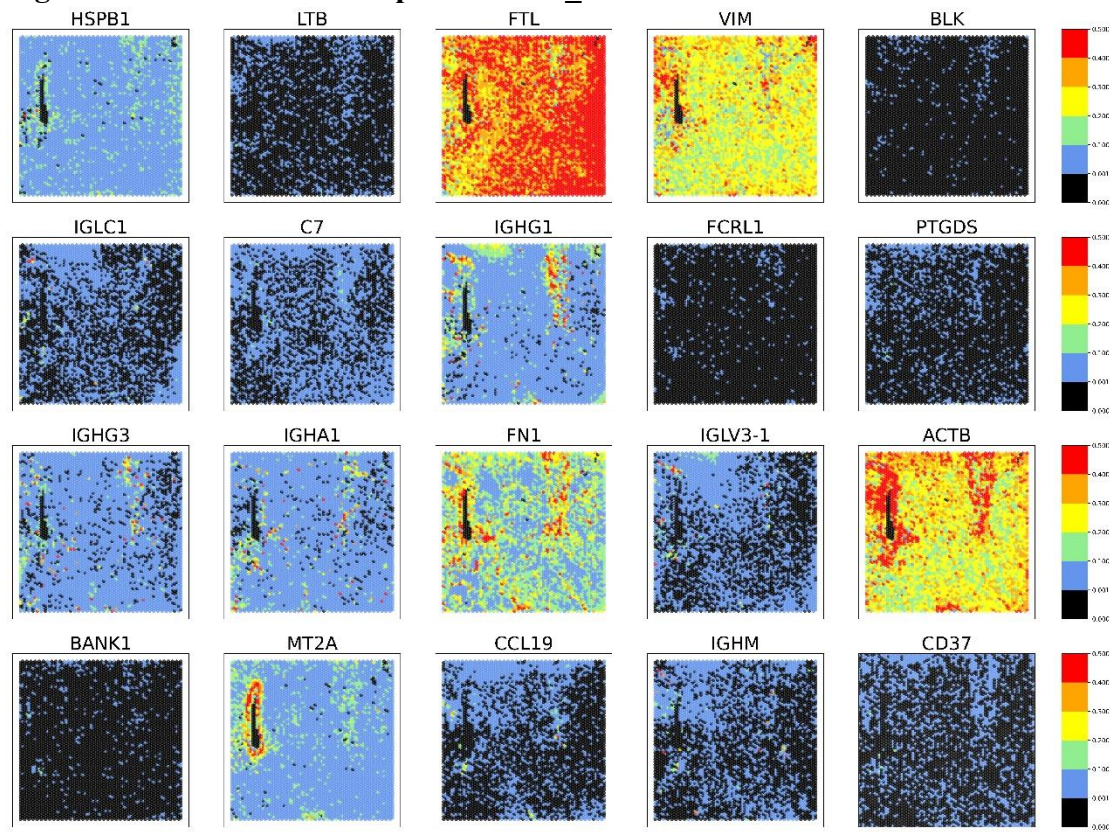

**Figure S16: The markers' expression in c\_45**

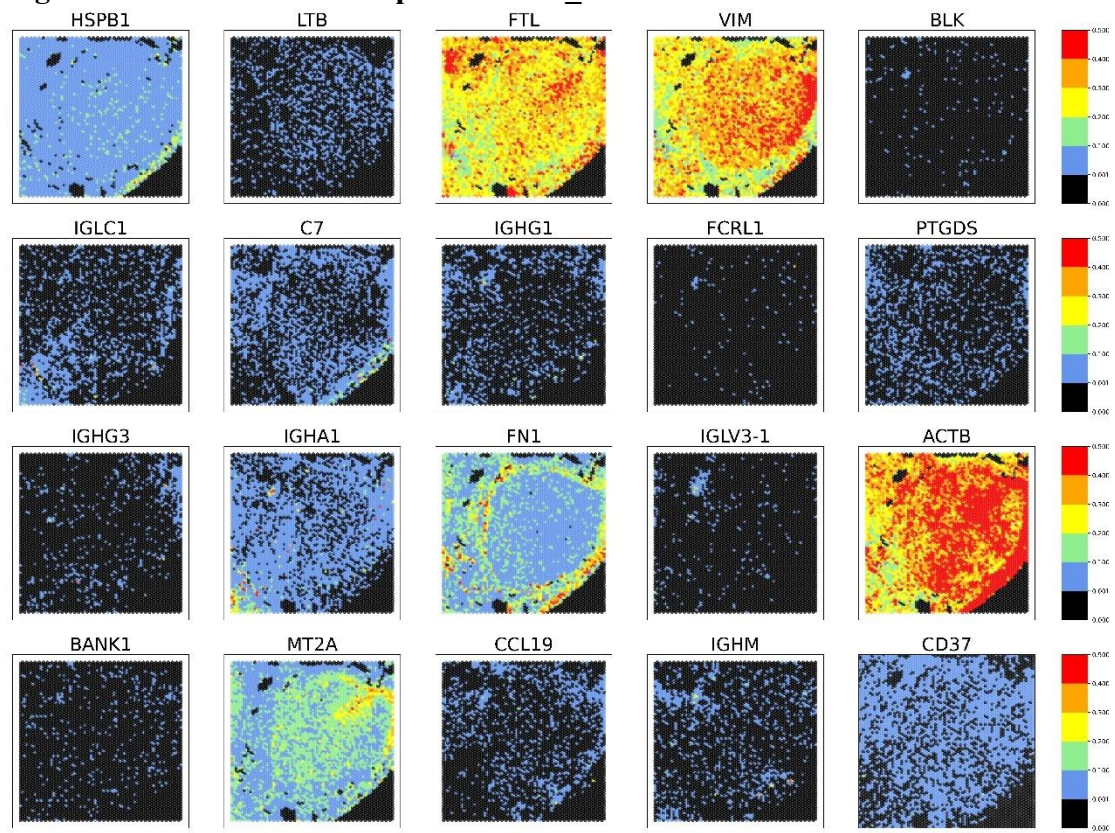



**Figure S17: The markers' expression in c\_51**

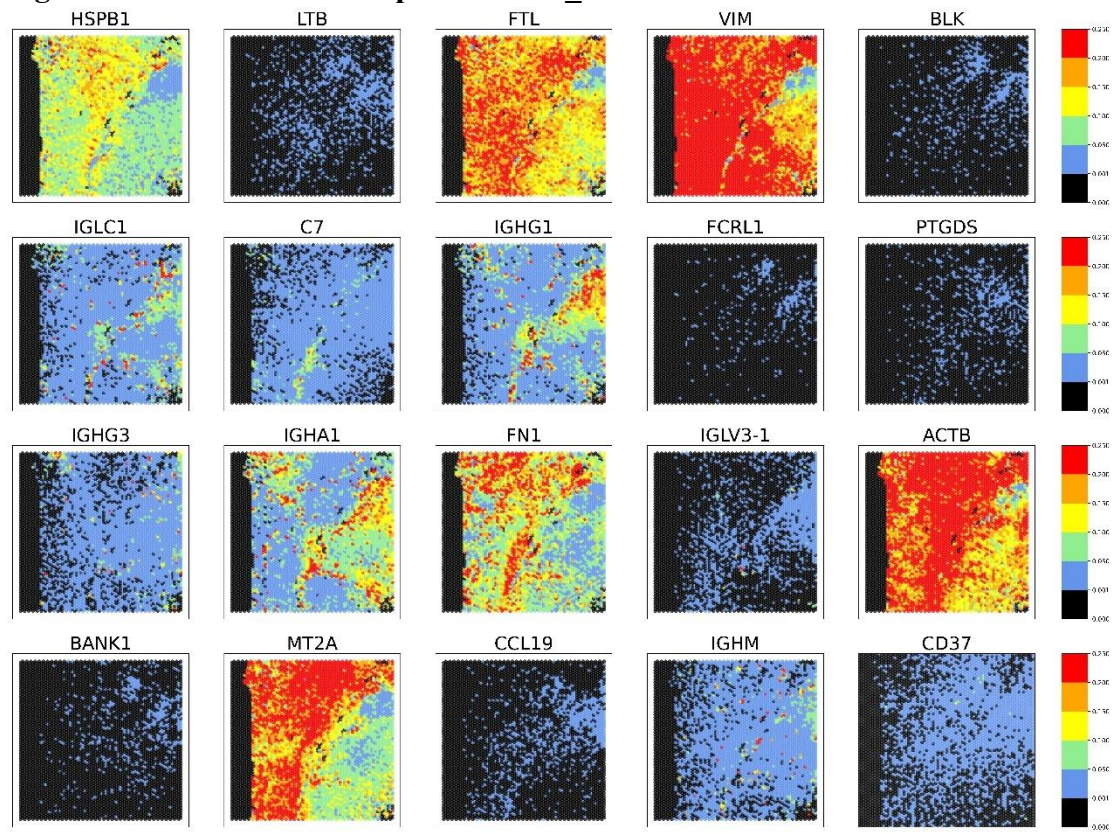

**Figure S18:** The annotation of TLS provided by the GEO dataset, which also represents the “correct answer” for model prediction. Yellow represents TLSs, while dark blue represents NO-TLS.

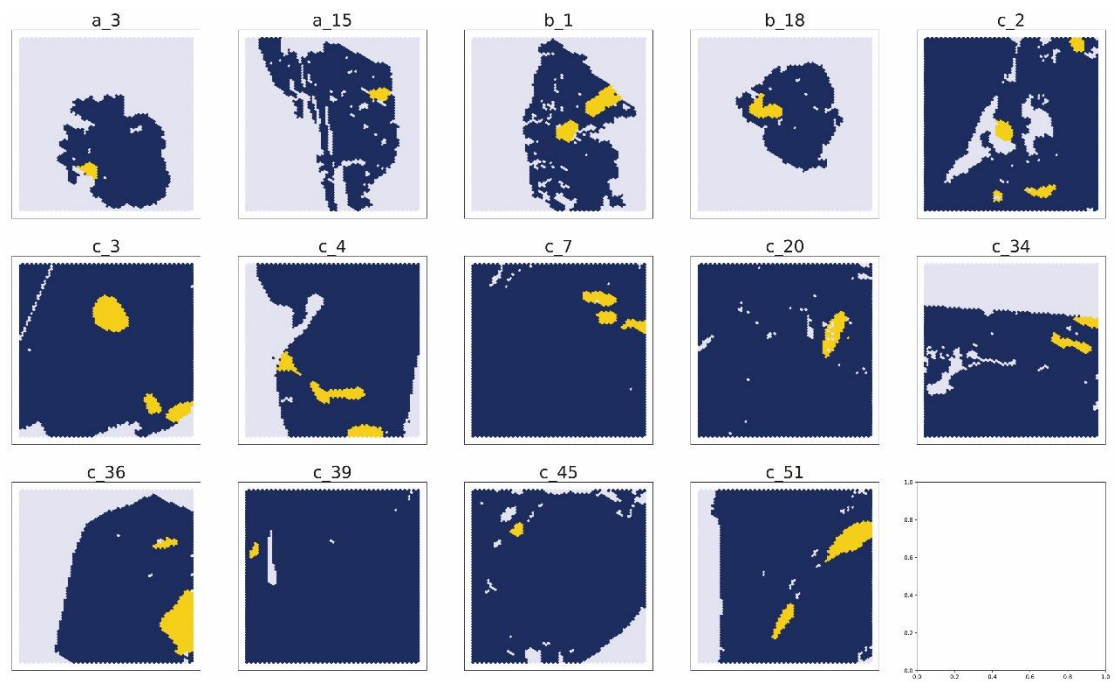

**Figure S19-S38:** The boxplot of gene expression levels of the identified markers calculated by the model constructed using the sample collected from the patients who have received immunological therapy(RI model) in the TLS and NO-TLS regions. Blue represents TLS, and pink represents NO-TLS. The gene name is shown in the title.

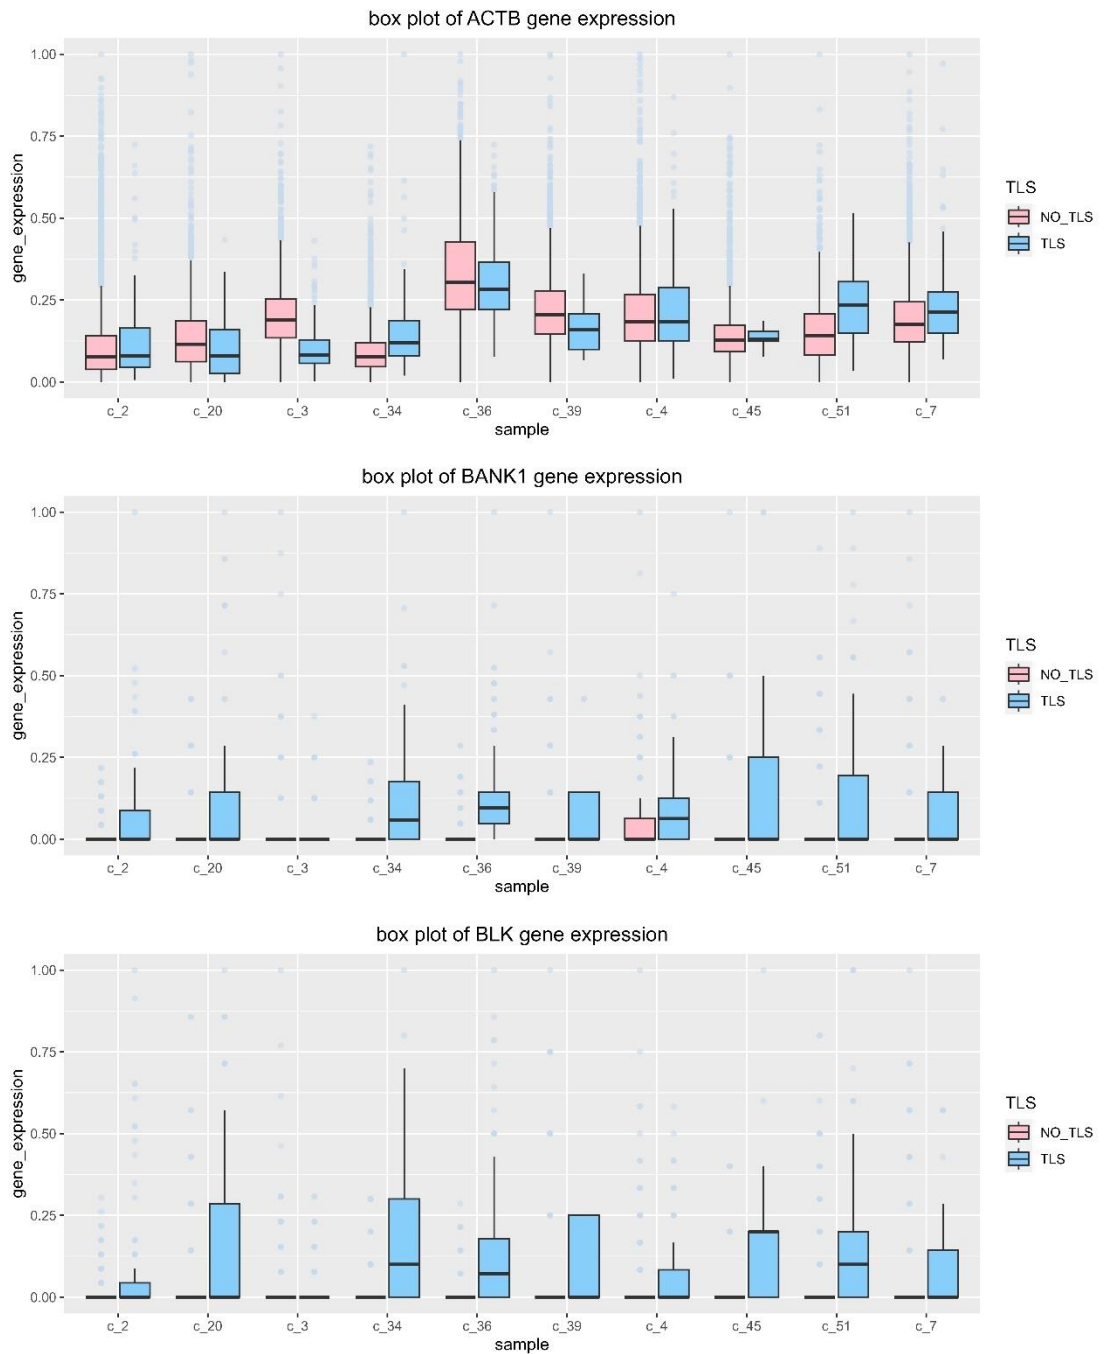

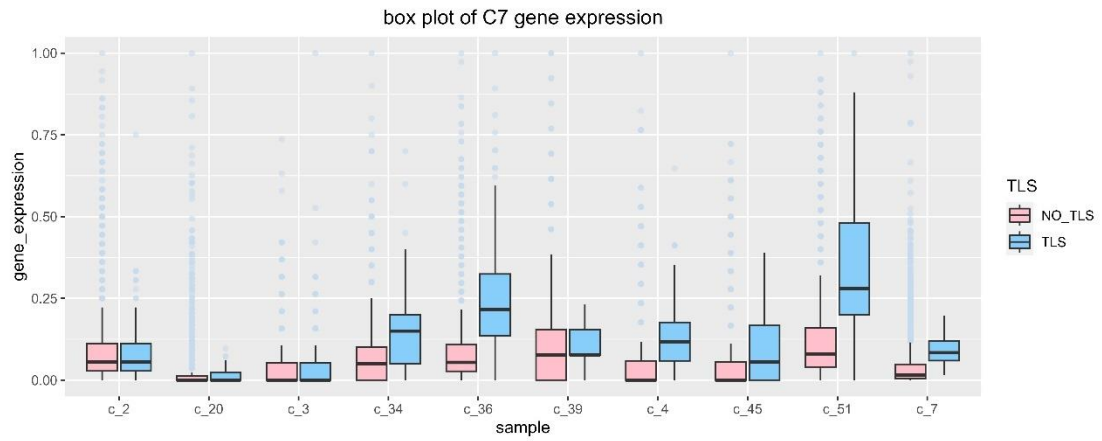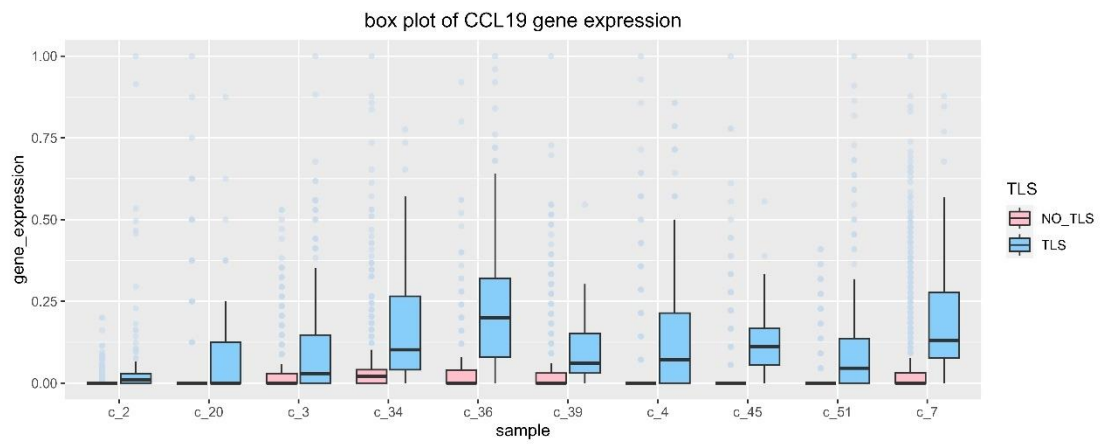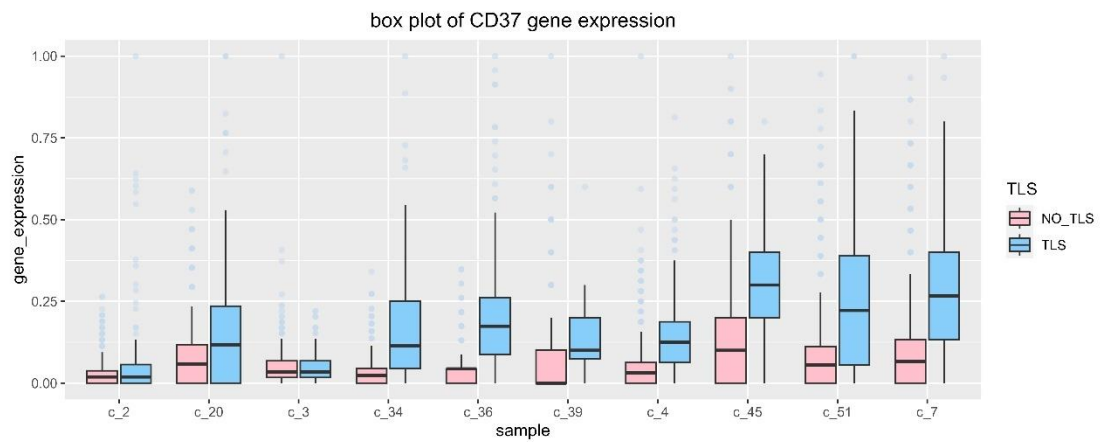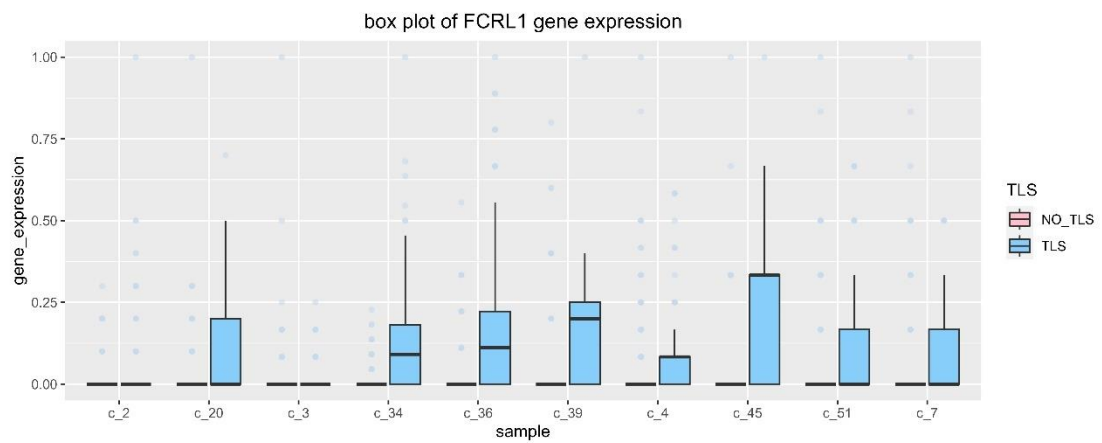

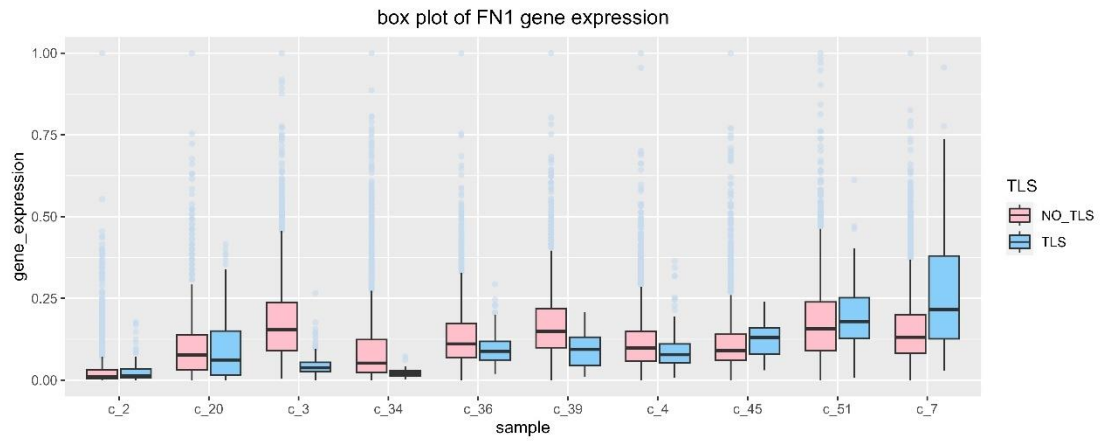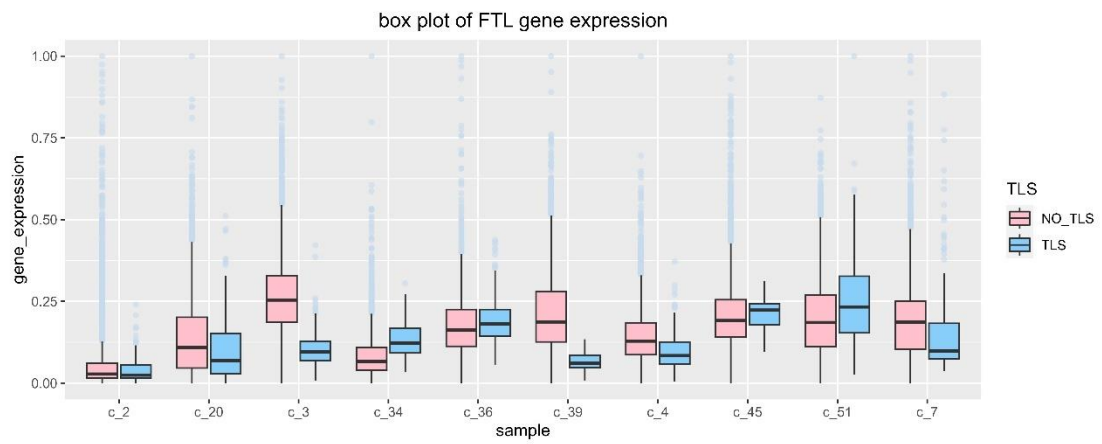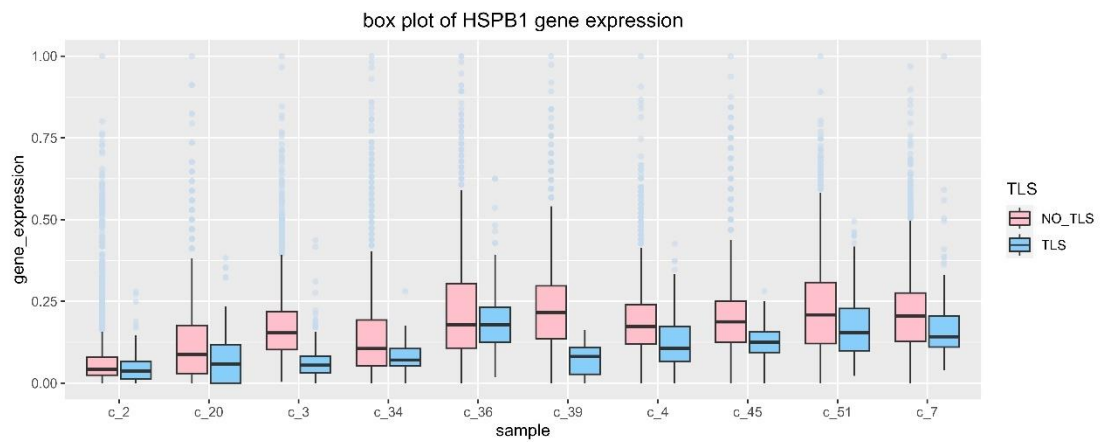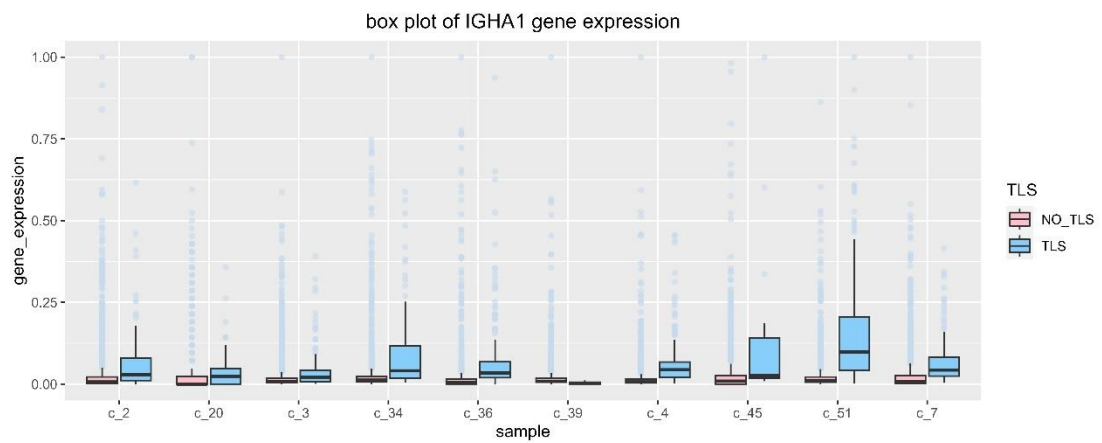



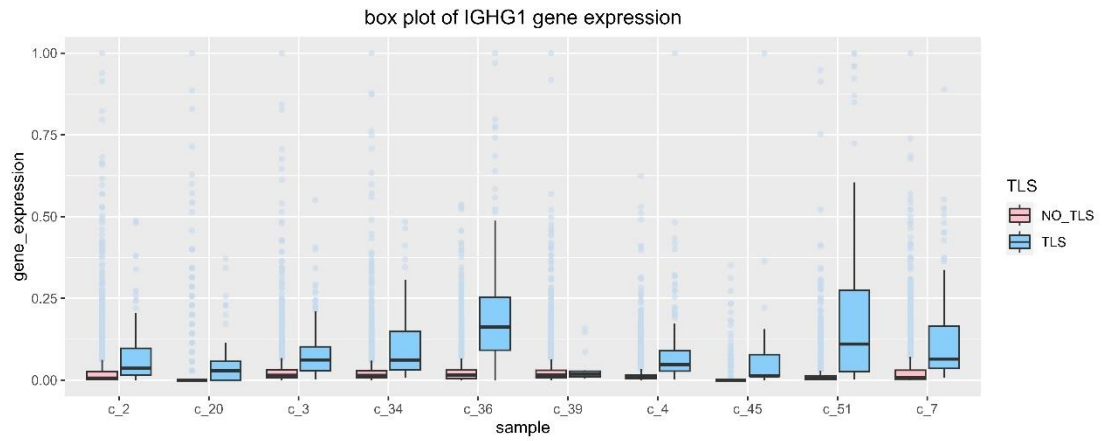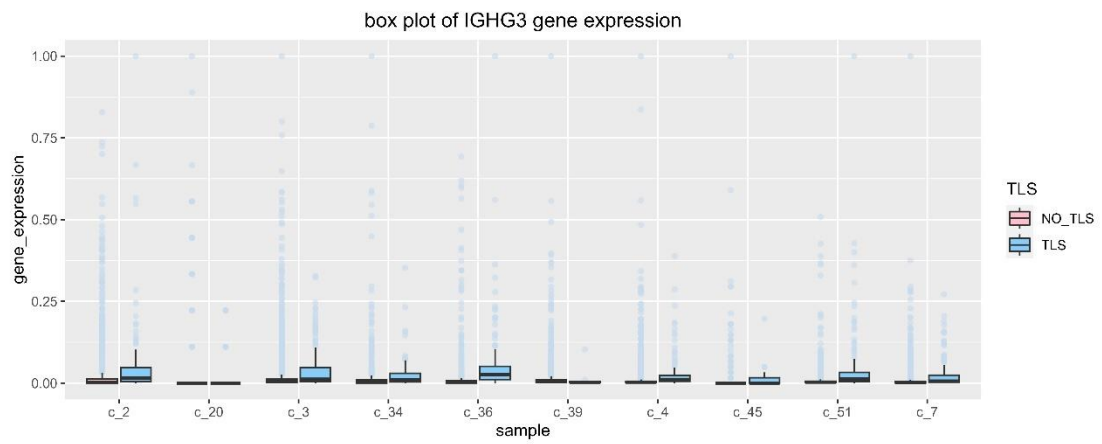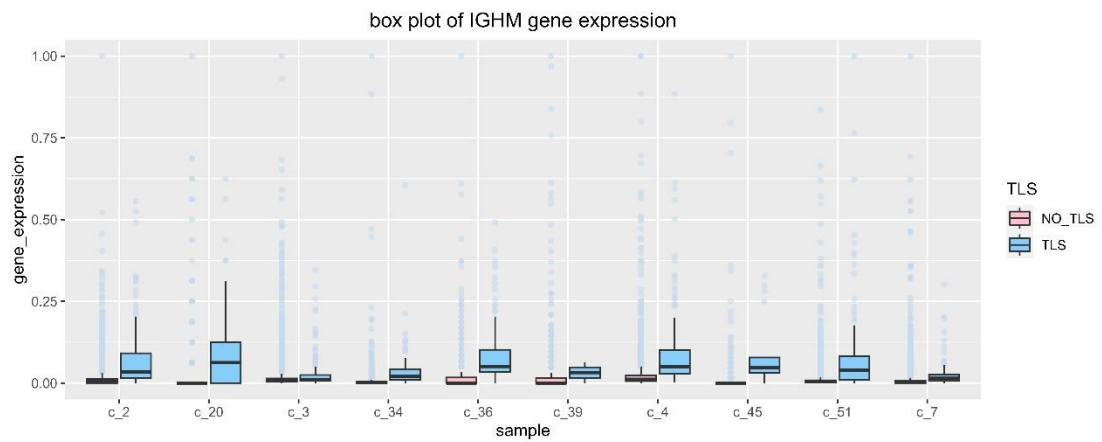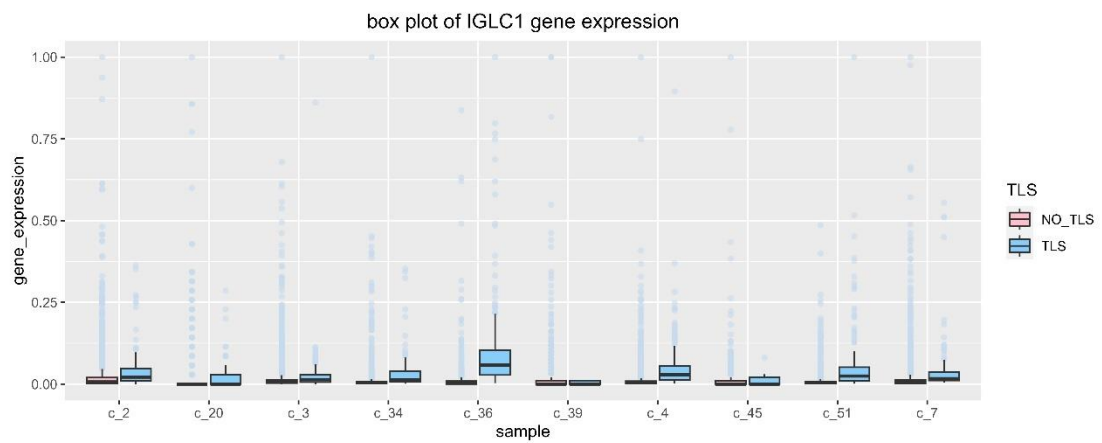

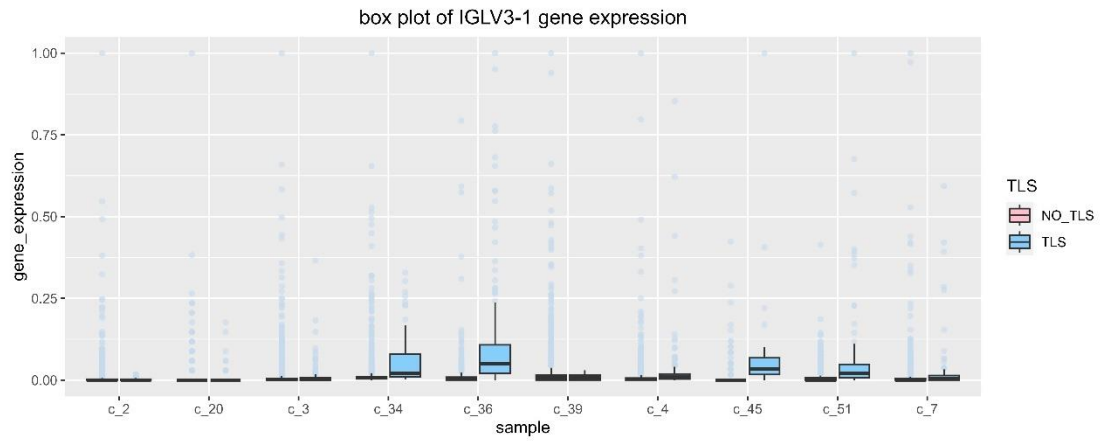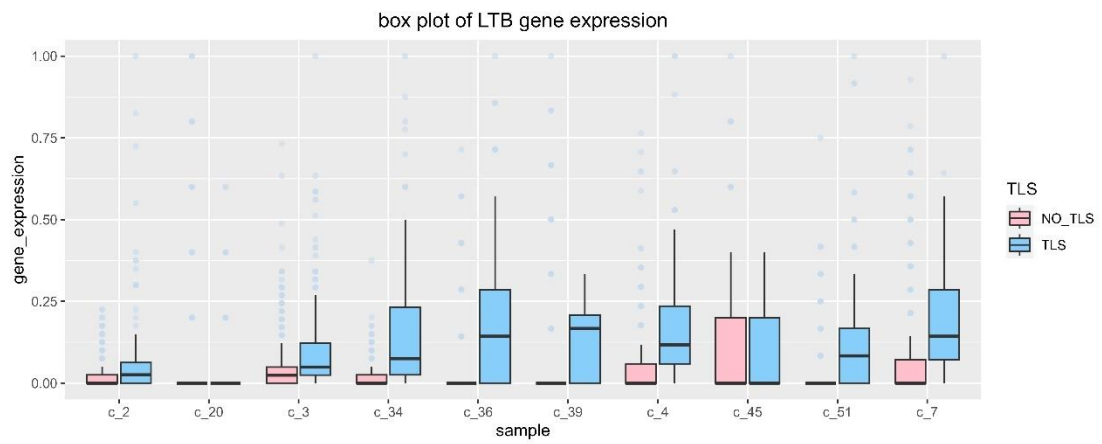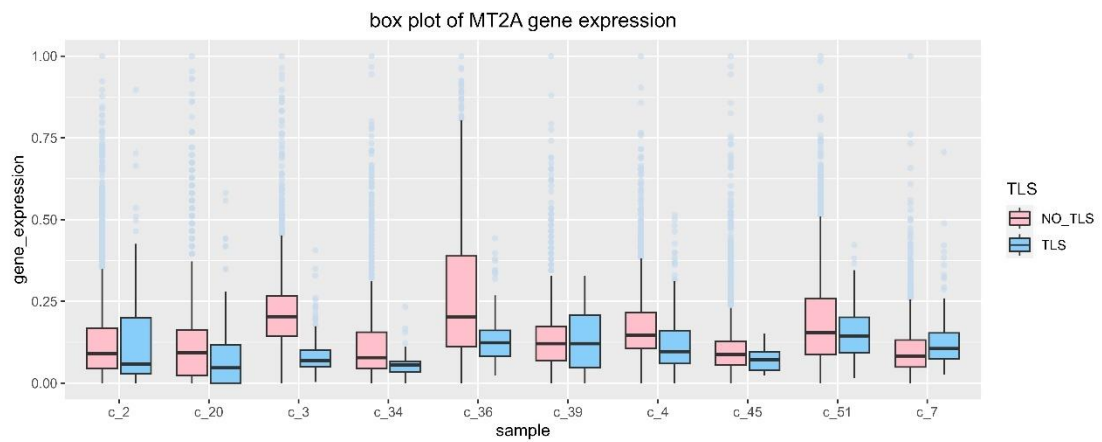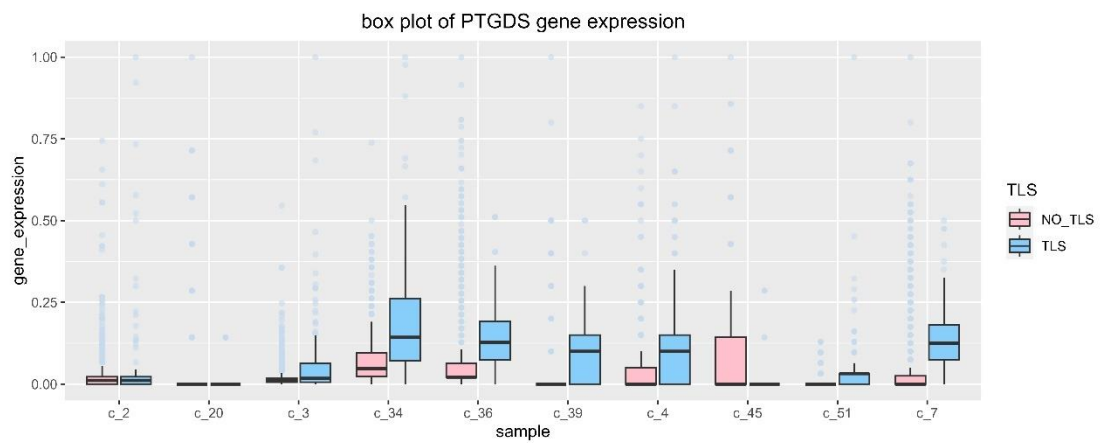

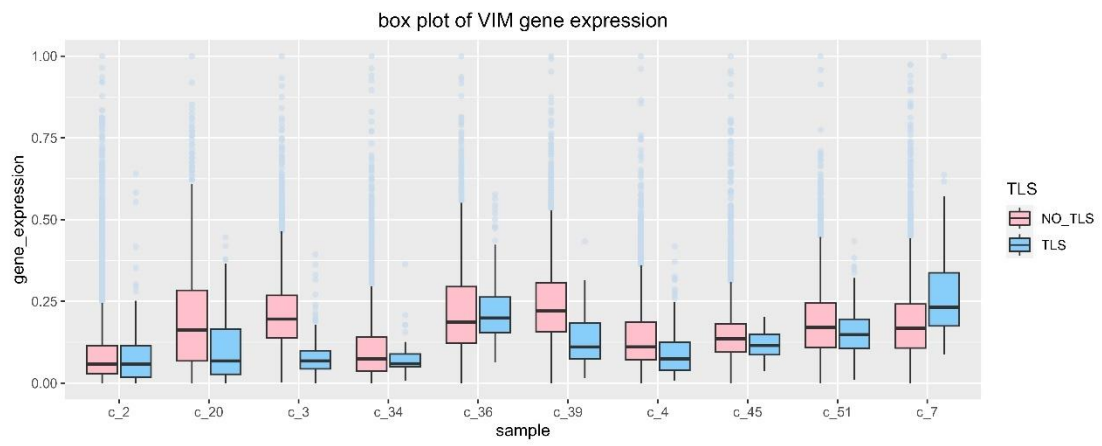



**Figure S39-S55:** The boxplot of gene expression of markers calculated by the model constructed using the sample collected from the patients who have not received immunological therapy(NRI model) in the TLS and NO-TLS regions. Green represents TLS, and gold represents NO-TLS. The gene name is shown in the title.

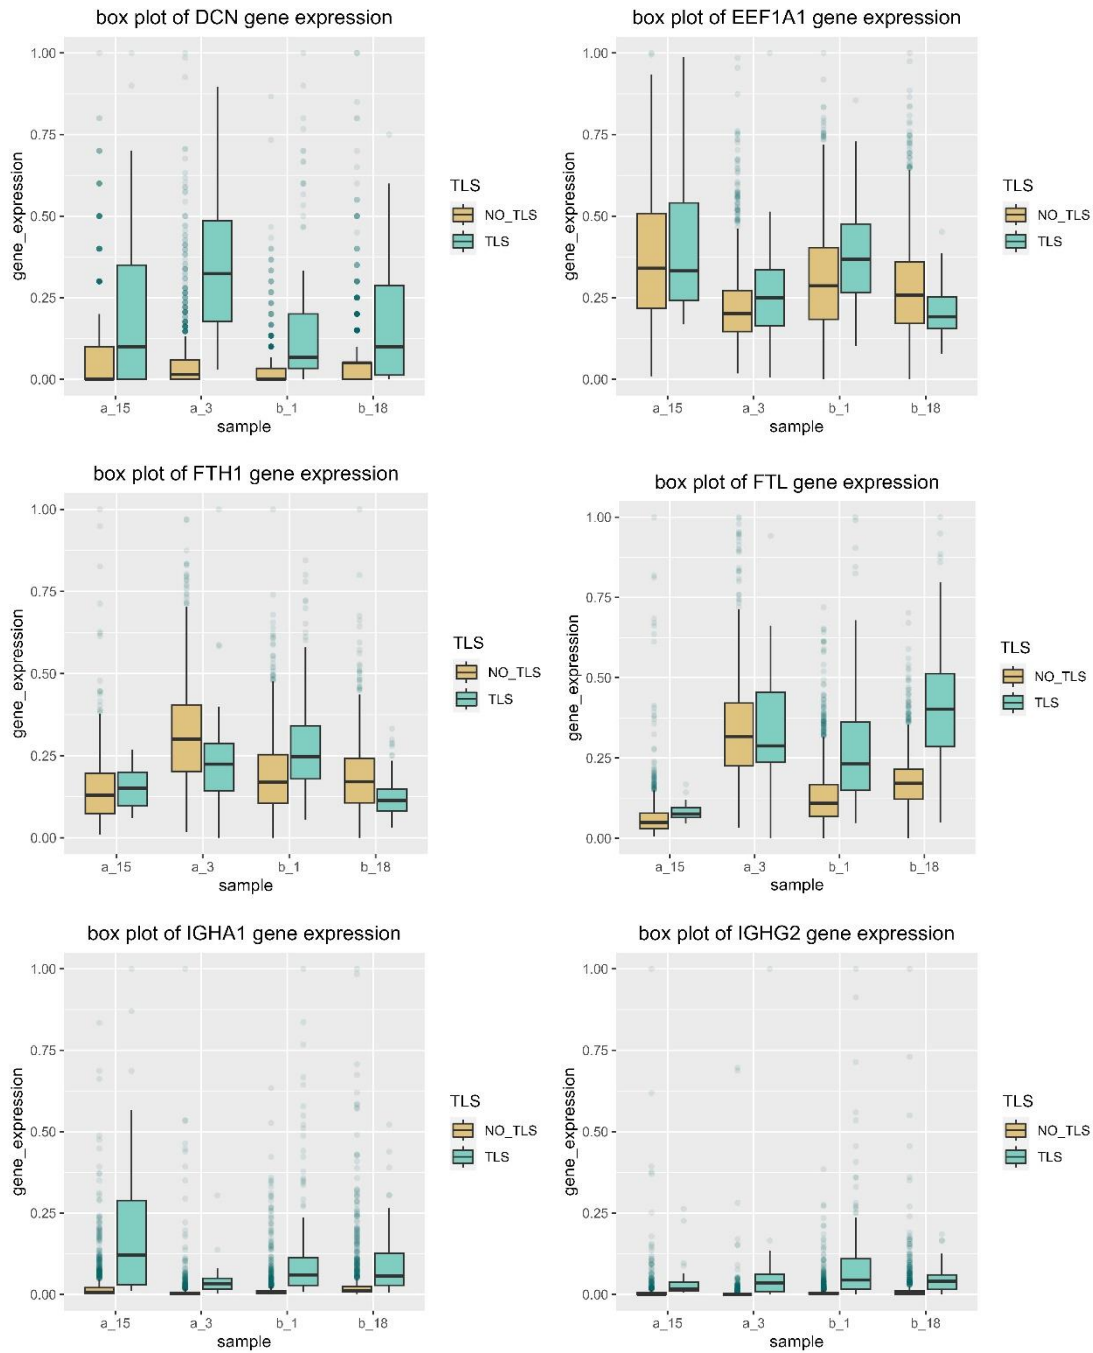

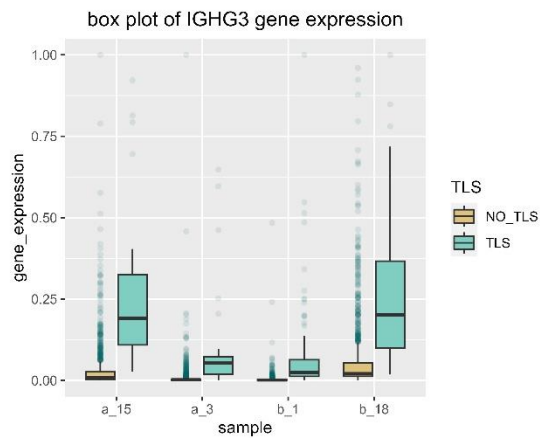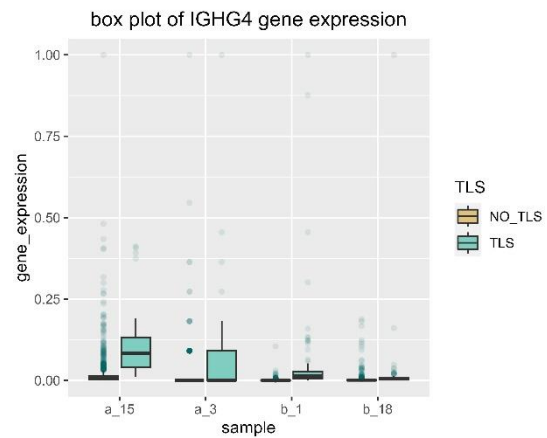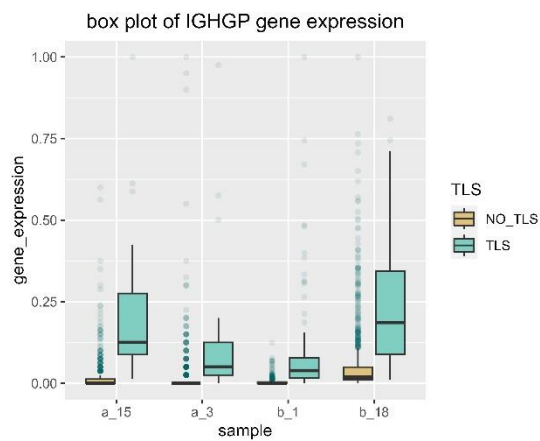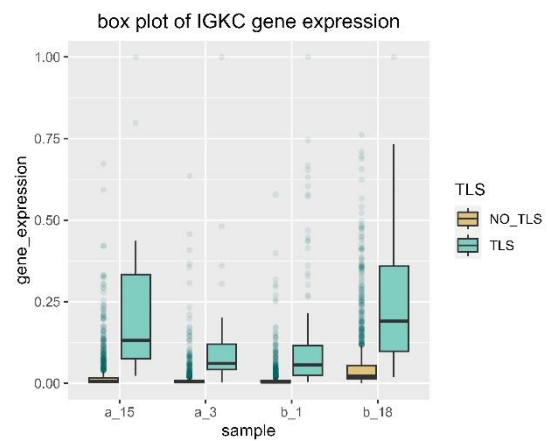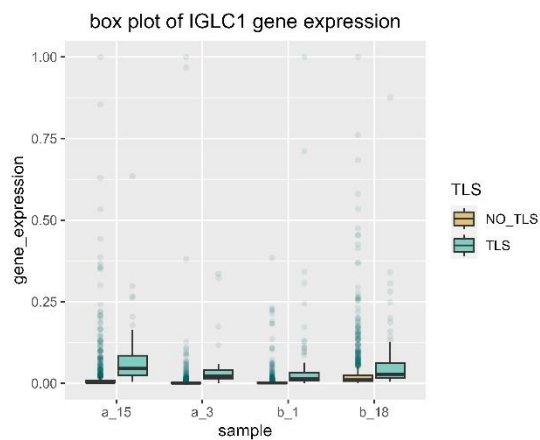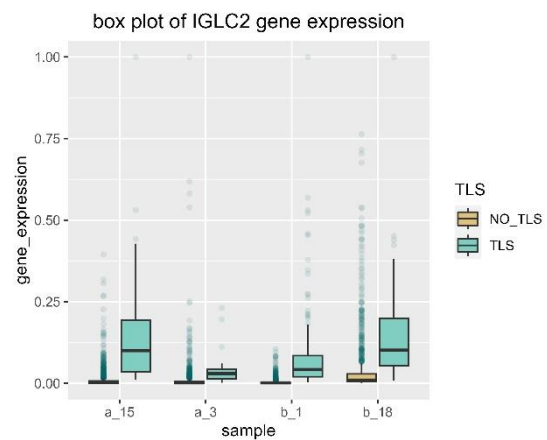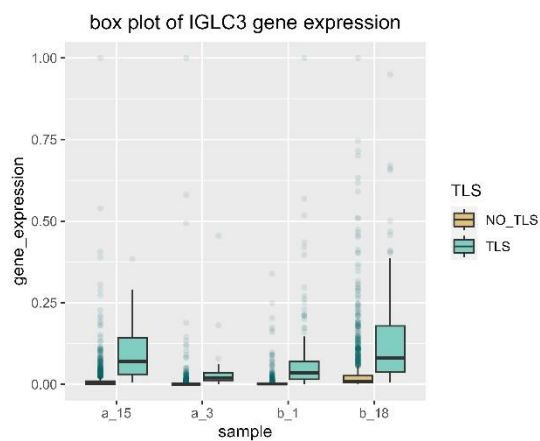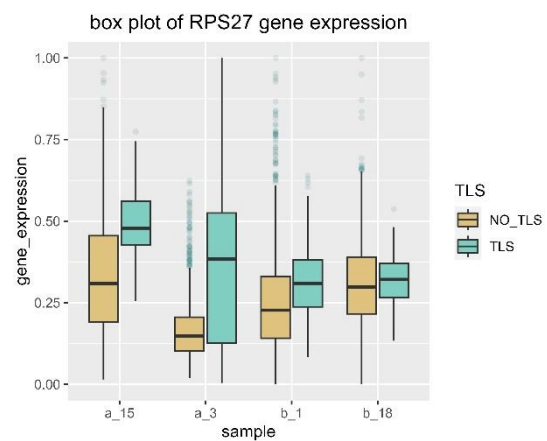

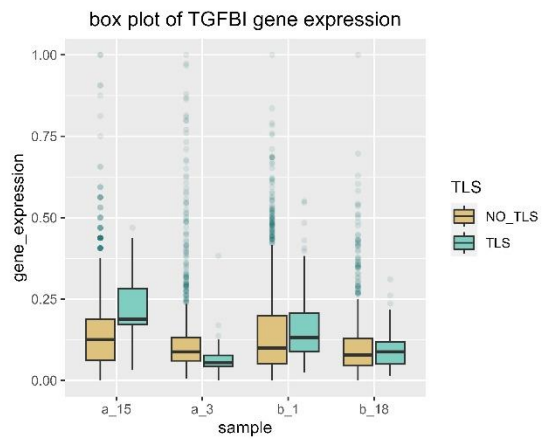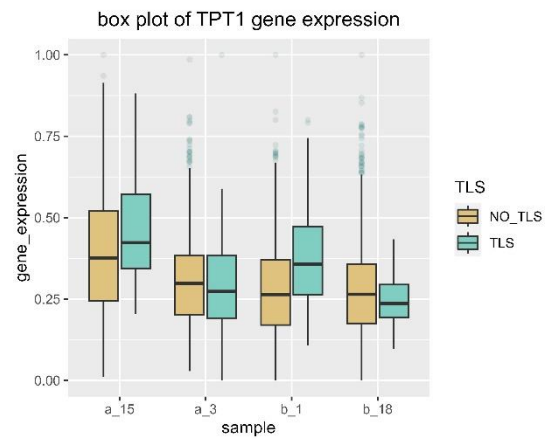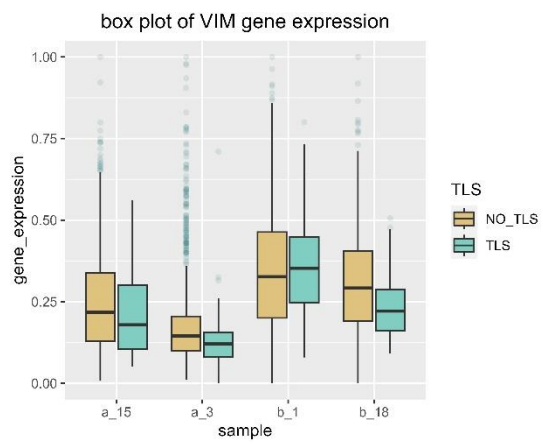

## Reference

1. National Institutes of Health: ACTB actin beta [ Homo sapiens (human) ]  
<https://www.ncbi.nlm.nih.gov/gene/60#summary> (2024) Accessed 22 Feb 2024
2. National Institutes of Health: BANK1 B cell scaffold protein with ankyrin repeats 1 [ Homo sapiens (human) ]  
<https://www.ncbi.nlm.nih.gov/gene/55024#summary> (2023) Accessed 22 Feb 2024
3. National Institutes of Health: BLK BLK proto-oncogene, Src family tyrosine kinase [ Homo sapiens (human) ]  
<https://www.ncbi.nlm.nih.gov/gene/640#summary> (2024) Accessed 22 Feb 2024
4. National Institutes of Health: C7 complement C7 [ Homo sapiens (human)]  
<https://www.ncbi.nlm.nih.gov/gene/730#summary> (2023) Accessed 22 Feb 2024
5. National Institutes of Health: CCL19 C-C motif chemokine ligand 19 [ Homo sapiens (human)]  
<https://www.ncbi.nlm.nih.gov/gene/6363#summary> (2024) Accessed 22 Feb 2024
6. National Institutes of Health: CD37 CD37 molecule [ Homo sapiens (human)]  
<https://www.ncbi.nlm.nih.gov/gene/951#summary> (2023) Accessed 22 Feb 2024
7. National Institutes of Health: DCN decorin [ Homo sapiens (human)]  
<https://www.ncbi.nlm.nih.gov/gene/1634#summary> (2024) Accessed 22 Feb 2024
8. National Institutes of Health: EEF1A1 eukaryotic translation elongation factor 1 alpha 1 [ Homo sapiens (human)]  
<https://www.ncbi.nlm.nih.gov/gene/1915#summary> (2024) Accessed 22 Feb 2024
9. National Institutes of Health: FCRL1 Fc receptor-like 1 [ Homo sapiens (human)]  
<https://www.ncbi.nlm.nih.gov/gene/115350#summary> (2023) Accessed 22 Feb 2024
10. National Institutes of Health: FN1 fibronectin 1 [ Homo sapiens (human)]  
<https://www.ncbi.nlm.nih.gov/gene/2335#summary> (2024) Accessed 22 Feb 2024
11. National Institutes of Health: FTH1 ferritin heavy chain 1 [ Homo sapiens (human)]  
<https://www.ncbi.nlm.nih.gov/gene/2495#summary> (2024) Accessed 22 Feb 2024
12. National Institutes of Health: FTL ferritin light chain [ Homo sapiens (human)]  
<https://www.ncbi.nlm.nih.gov/gene/2495#summary> (2024) Accessed 22 Feb 2024
13. National Institutes of Health: HSPB1 heat shock protein family B (small) member 1 [ Homo sapiens (human)]  
<https://www.ncbi.nlm.nih.gov/gene/3315#summary> (2024) Accessed 22 Feb 2024
14. National Institutes of Health: IGHA1 immunoglobulin heavy constant alpha 1 [ Homo sapiens (human)]  
<https://www.ncbi.nlm.nih.gov/gene/3493#summary> (2024) Accessed 22 Feb 2024
15. National Institutes of Health IGHG1 immunoglobulin heavy constant gamma 1 (G1m marker) [ Homo sapiens (human) ]  
<https://www.ncbi.nlm.nih.gov/gene/3500#summary>(2023)Accessed 22 Feb 2024
16. National Institutes of Health: IGHG2 immunoglobulin heavy constant gamma 2 (G2m marker) [ Homo sapiens (human)]  
<https://www.ncbi.nlm.nih.gov/gene/3501#summary> (2024) Accessed 22 Feb 2024

17. National Institutes of Health: IGHG4 immunoglobulin heavy constant gamma 4 (G4m marker) [ Homo sapiens (human)]  
<https://www.ncbi.nlm.nih.gov/gene/3503#summary> (2024) Accessed 22 Feb 2024
18. National Institutes of Health: IGLC1 immunoglobulin lambda constant 1 [ Homo sapiens (human)] <https://www.ncbi.nlm.nih.gov/gene/3537#summary> (2023)  
Accessed 22 Feb 2024
19. National Institutes of Health: IGLC2 immunoglobulin lambda constant 2 [ Homo sapiens (human)] <https://www.ncbi.nlm.nih.gov/gene/3538#summary> (2024)  
Accessed 22 Feb 2024
20. National Institutes of Health: IGLC3 immunoglobulin lambda constant 3 (Kern-Oz+ marker) [ Homo sapiens (human)]  
<https://www.ncbi.nlm.nih.gov/gene/3539#summary> (2024) Accessed 22 Feb 2024
21. National Institutes of Health: IGHG3 immunoglobulin heavy constant gamma 3 (G3m marker) [ Homo sapiens (human)]  
<https://www.ncbi.nlm.nih.gov/gene/3502#summary> (2023) Accessed 22 Feb 2024
22. National Institutes of Health: IGKC immunoglobulin kappa constant [ Homo sapiens (human) ] <https://www.ncbi.nlm.nih.gov/gene/3514#summary> (2024)  
Accessed 22 Feb 2024
23. National Institutes of Health: IGHM immunoglobulin heavy constant mu [ Homo sapiens (human)] <https://www.ncbi.nlm.nih.gov/gene/3507#summary> (2024)  
Accessed 22 Feb 2024
24. GeneCards: IGHGP Gene - Immunoglobulin Heavy Constant Gamma P (Non-Functional) <https://www.genecards.org/cgi-bin/carddisp.pl?gene=IGHGP&keywords=IGHGP> Accessed 22 Feb 2024
25. National Institutes of Health: IGLV3-1 immunoglobulin lambda variable 3-1 [ Homo sapiens (human)] <https://www.ncbi.nlm.nih.gov/gene/28809#summary> (2023) Accessed 22 Feb 2024
26. National Institutes of Health: LTB lymphotoxin beta [ Homo sapiens (human)]  
<https://www.ncbi.nlm.nih.gov/gene/4050#summary> (2023) Accessed 22 Feb 2024
27. National Institutes of Health: MT2A metallothionein 2A [ Homo sapiens (human)]  
<https://www.ncbi.nlm.nih.gov/gene/4502#summary> (2023) Accessed 22 Feb 2024
28. National Institutes of Health: PTGDS prostaglandin D2 synthase [ Homo sapiens (human)] <https://www.ncbi.nlm.nih.gov/gene/5730#summary> (2023) Accessed 22 Feb 2024
29. National Institutes of Health: RPS27 ribosomal protein S27 [ Homo sapiens (human)] <https://www.ncbi.nlm.nih.gov/gene/6232#summary> (2024) Accessed 22 Feb 2024
30. National Institutes of Health: TGFB1 transforming growth factor beta 1 [ Homo sapiens (human)] <https://www.ncbi.nlm.nih.gov/gene/7040#summary> (2024)  
Accessed 22 Feb 2024
31. National Institutes of Health Accessed: TPT1 tumor protein, translationally-controlled 1 [ Homo sapiens (human)]  
<https://www.ncbi.nlm.nih.gov/gene/7178#summary> (2024) 22 Feb 2024
32. National Institutes of Health: VIM vimentin [ Homo sapiens (human)]

<https://www.ncbi.nlm.nih.gov/gene/7431#summary> (2024) Accessed 22 Feb 2024
